# Supplementary material for: Equipping metallo-supramolecular macrocycles with functional groups: assemblies of pyridine-substituted urea ligands
Source: Royal Society of Chemistry journal article supplement (doi:10.1039/c2dt30190c), 2012-01-01
Supplement: c2dt30190c.pdf [file c2dt30190c.pdf]

# Supporting Information

## Equipping metallocupramolecular macrocycles with functional groups: Assemblies of pyridine-substituted urea ligands

Ralf W. Troff,<sup>a,b</sup> Rainer Hovorka,<sup>c</sup> Torsten Weilandt,<sup>c</sup> Arne Lützen,<sup>c</sup> Mario Cetina,<sup>b</sup> Martin Nieger,<sup>d</sup> Dieter Lentz,<sup>e</sup> Kari Rissanen<sup>\*,b</sup> and Christoph A. Schalley<sup>\*,a</sup>

<sup>a</sup> Institut für Chemie und Biochemie, Freie Universität Berlin, Takustraße 3, 14195 Berlin, Germany, Fax: +49 30 838 55817; Tel: +49 30 838 52639; E-mail: christoph@schalley-lab.de

<sup>b</sup> Department of Chemistry, Nanoscience Center, University of Jyväskylä, P. O. Box 35, 40014 Jyväskylä, Finland; Fax: +358-14-2602501; phone: +358-50-5623721; E-mail: kari.t.rissanen@jyu.fi

<sup>c</sup> Kekulé-Institut für Organische Chemie und Biochemie, Universität Bonn, Gerhard-Domagk-Str. 1, 53121 Bonn, Germany

<sup>d</sup> Laboratory of Inorganic Chemistry, Department of Chemistry, P.O.Box 55, 00014 University of Helsinki, Finland

<sup>e</sup> Institut für Chemie und Biochemie, Freie Universität Berlin, Fabeckstrasse 34-36, 14195 Berlin, Germany

## Table of contents

|          |                                                                                                       |            |
|----------|-------------------------------------------------------------------------------------------------------|------------|
| <b>1</b> | <b>Experimental Section</b>                                                                           | <b>S2</b>  |
| 1.1      | Ligand syntheses                                                                                      | S3         |
| 1.2      | Self-assembly of metallo-supramolecular complexes                                                     | S6         |
| 1.3      | Crystal structure data                                                                                | S11        |
| <b>2</b> | <b>Additional data on the di-pyridylurea ligands</b>                                                  | <b>S14</b> |
| <b>3</b> | <b>Additional data on the metallo-supramolecular complexes</b>                                        | <b>S22</b> |
| <b>4</b> | <b>Titration of 24a/b with NBu<sub>4</sub>H<sub>2</sub>PO<sub>4</sub> in DMF-<i>d</i><sub>7</sub></b> | <b>S26</b> |
| <b>5</b> | <b>References</b>                                                                                     | <b>S27</b> |

## 1. Experimental Section

### Molecular modeling

The calculated structures were optimized with the MM2 force field implemented in the CAChe WorkSystem Pro program package for Windows (version 6.1.12.33; Fujitsu Ltd., Krakow/Poland, 2000-2004).

### Melting points

Melting points were measured with a Büchi 510 Melting Point apparatus and are not corrected. Due to the properties of the silicon oil used in this apparatus, only melting points up to 250 °C could be measured.

### NMR spectroscopy

$^1\text{H}$  NMR,  $^{13}\text{C}$  NMR,  $^{31}\text{P}$  NMR,  $^1\text{H}$ ,  $^1\text{H}$  NOESY NMR,  $^1\text{H}$  2D DOSY NMR spectra were recorded on Joel ECX 400 MHz, Joel ECP 500 MHz, Bruker AC 250 MHz, Bruker AC 500 MHz, Bruker AM 300, Bruker DMX 500 MHz, and Bruker DRX 500 MHz NMR spectrometers. Chemical shifts are reported in ppm. In  $^1\text{H}$  and  $^{13}\text{C}$  NMR spectra, the residual solvents were used as internal standards. For  $^{31}\text{P}$  NMR spectra 85% phosphoric acid was used as external standard.  $^{13}\text{C}$  and  $^{31}\text{P}$  NMR spectra were recorded with broadband decoupling for  $^1\text{H}$ . Coupling constants ( $J$ ) are given in Hz. The abbreviations used for the signal multiplicities are: s = singlet; d = doublet; t = triplet; m = multiplet and br for broad signals.

### Mass spectrometry

EI mass spectra were measured with a MAT 711 EI mass spectrometer from Varian MAT (Bremen, Germany) or with a HP 5989 A EI mass spectrometer from HEWLETT-PACKARD in Palo Alto (CA, USA). Standard ionization energies of 70 and 80 eV were used. HRMS ESI spectra were recorded using an Agilent 6210 ESI TOF mass spectrometer from Agilent Technologies in Santa Clara (CA, USA). The flow rate was set to 4  $\mu\text{L}/\text{min}$  and the spray voltage was adjusted to 4 kV. The desolvation gas was used with a pressure of 15 psi (1 bar). All other parameters were optimized to get the maximal abundance for the respective  $[\text{M}+\text{H}]^+$ . ESI-TOF and ESI FTICR mass spectrometer were used to analyze the complexes under study. The experiments measured from pure DMF were performed with a QSTAR Elite mass spectrometer equipped with an API 200 TurboIonSpray ESI source from AB Sciex (former MDS Sciex) in Concord, Ontario (Canada). The samples were injected into the ESI source with a flow rate of 5  $\mu\text{L}/\text{min}$ . The electric potential of the ESI capillary was set to 4.5

kV. All other parameters were optimized to get maximum abundance of the ions under study. ESI FTICR mass spectrometric experiments were performed on an Ionspec QFT-7 ESI FTICR mass spectrometer from Agilent Technologies (formerly Varian Inc., Walnut Creek, USA). The ESI FTICR mass spectrometer is equipped with a 7 T superconducting magnet and a Micromass Z-spray ESI source from Waters Co. (Saint-Quentin, France) which had a stainless steel capillary with an inner diameter of 0.65 mm. In regular experiments, the solvent flow rate of the integrated syringe pump was set to 4  $\mu\text{L}/\text{min}$  and the spray voltage was 3.8 kV. All other parameters were optimized for maximum abundances of the desired ions. Both, the temperatures of the ESI source and the steel needle, were set to 40  $^{\circ}\text{C}$ . No nebulizer gas was used throughout the experiments.

### Starting materials

The starting materials for the syntheses were used as purchased. Metal complexes **17** and **18** were prepared according to literature procedures.<sup>1</sup>

## 1.1 Ligand syntheses

### General procedure for urea ligand synthesis<sup>2</sup>

500 mg of the aminopyridine or (aminomethyl)pyridine and 0.6 eq. of *N,N'*-carbonyldiimidazole were dissolved in 80 mL of dry toluene. The solution was heated to 80  $^{\circ}\text{C}$  for 3.5 h. A second portion of 0.1 eq. of *N,N'*-carbonyl-diimidazole was added to the hot solution. After 30 min. of heating, the mixture was cooled to r.t. and stirred for 15 h at r.t. The resulting precipitate was collected by filtration and washed with toluene and diethyl ether.

**1,3-di(pyridin-3-yl)urea 9** ( $\text{C}_{11}\text{H}_{10}\text{N}_4\text{O}$ ; 214.22 g/mol): Using the general synthetic procedure 1 546.93 mg (2.55 mmol, 85 % c.y.) of **9** were obtained as a white powder.  $^1\text{H}$  NMR (400 MHz,  $\text{DMSO-}d_6$ , 298 K):  $\delta$  = 8.77 (s, 2 H, NH), 8.55 (d, 2 H,  $^4J_{\text{HH}}$  = 2.4 Hz,  $\text{H}_{o\text{-py}}$ ), 8.14 (dd, 2 H,  $^3J_{\text{HH}}$  = 4.7 Hz,  $^4J_{\text{HH}}$  = 1.5 Hz,  $\text{H}_{o\text{-py}}$ ), 7.93 (ddd, 2 H,  $^3J_{\text{HH}}$  = 8.3 Hz,  $^4J_{\text{HH}}$  = 2.4 Hz,  $^4J_{\text{HH}}$  = 1.5 Hz,  $\text{H}_{p\text{-py}}$ ), 7.20 (dd, 2 H,  $^3J_{\text{HH}}$  = 8.3 Hz,  $^3J_{\text{HH}}$  = 4.7 Hz,  $\text{H}_{m\text{-py}}$ ) ppm.  $^{13}\text{C}$  NMR (100 MHz,  $\text{DMSO-}d_6$ , 298 K):  $\delta$  = 151.7 (CO), 142.1 ( $\text{C}_{o\text{-py}}$ ), 39.3 ( $\text{C}_{o\text{-py}}$ ), 135.3 ( $\text{C}_{p\text{-py}}$ ), 124.4 ( $\text{C}_{m\text{-py}}$ ), 122.4 ( $\text{C}_{m\text{-py}}$ ) ppm. ESI MS (HRMS): calculated: 215.0933 amu ( $[\text{M}+\text{H}]^+$ ); found: 215.0931 amu ( $[\text{M}+\text{H}]^+$ ). EI MS ( $\text{EI}^+$ , 70 eV):  $m/z$  (%) = 214.1 ( $[\text{M}]^+$ , 100), 121.1 ( $[\text{M}$

– PyNH<sup>+</sup>, 25), 120.1 ([M – PyNH<sub>2</sub>]<sup>+</sup>, 14), 94.1 ([PyNH<sub>2</sub>]<sup>+</sup>, 78), 78.1 ([Py – H]<sup>+</sup>, 14), 67.1 ([C<sub>4</sub>H<sub>5</sub>N]<sup>+</sup>, 15). m.p. > 250 °C.

**1,3-bis(2-methylpyridin-3-yl)urea 10** (C<sub>13</sub>H<sub>14</sub>N<sub>4</sub>O; 242.28 g/mol): Using the general synthetic procedure 1 336.06 mg (1.39 mmol, 60 % c.y.) of **10** could be obtained as a white powder. <sup>1</sup>H NMR (250 MHz, DMSO-*d*<sub>6</sub>, 303 K): δ = 8.59 (s, 2 H, NH), 8.18 (d, 2 H, <sup>3</sup>J<sub>HH</sub> = 8.3 Hz, H<sub>o-py</sub>), 8.13 (d, 2 H, <sup>3</sup>J<sub>HH</sub> = 4.7 Hz, H<sub>p-py</sub>), 7.23 (dd, 2 H, <sup>3</sup>J<sub>HH</sub> = 8.3 Hz and <sup>3</sup>J<sub>HH</sub> = 4.7 Hz, H<sub>m-py</sub>), 2.50 (s, 6 H, CH<sub>3</sub>) ppm. <sup>13</sup>C NMR (63 MHz, DMSO-*d*<sub>6</sub>, 303 K): δ = 153.0 (CO), 148.2 (C<sub>o-py</sub>), 142.8 (C<sub>o-py</sub>), 133.6 (C<sub>m-py</sub>), 127.9 (C<sub>p-py</sub>), 121.4 (C<sub>m-py</sub>), 21.2 (CH<sub>3</sub>) ppm. ESI MS (HRMS): calculated: 243.1246 amu ([M+H]<sup>+</sup>); found: 243.1239 amu ([M+H]<sup>+</sup>). EI MS (EI<sup>+</sup>, 80 eV): m/z (%) = 241.9 ([M]<sup>+</sup>, 40), 134.7 ([M + H – C<sub>6</sub>H<sub>8</sub>N<sub>2</sub>]<sup>+</sup>, 16), 133.7 ([M – C<sub>6</sub>H<sub>8</sub>N<sub>2</sub>]<sup>+</sup>, 22), 108.0 ([C<sub>6</sub>H<sub>8</sub>N<sub>2</sub>]<sup>+</sup>, 100), 92.2 ([C<sub>6</sub>H<sub>6</sub>N]<sup>+</sup>, 8), 80.2 ([Py + H]<sup>+</sup>, 20). m.p. > 250 °C.

**1,3-bis(4-methylpyridin-3-yl)urea 11** (C<sub>13</sub>H<sub>14</sub>N<sub>4</sub>O; 242.28 g/mol): Using the general synthetic procedure 1 347.18 mg (1.43 mmol, 62 % c.y.) of **11** were obtained as a white powder. <sup>1</sup>H NMR (300 MHz, DMSO-*d*<sub>6</sub>, 298 K): δ = 8.88 (s, 2 H, NH), 8.45 (s, 2 H, H<sub>o-py</sub>), 8.15 (d, 2 H, <sup>3</sup>J<sub>HH</sub> = 4.9 Hz, H<sub>o-py</sub>), 7.23 (d, 2 H, <sup>3</sup>J<sub>HH</sub> = 4.9 Hz, H<sub>m-py</sub>), 2.28 (s, 6 H, CH<sub>3</sub>) ppm. <sup>13</sup>C NMR (75.5 MHz, DMSO-*d*<sub>6</sub>, 298 K): δ = 152.8 (CO), 144.0 (C<sub>o-py</sub>), 143.5 (C<sub>o-py</sub>), 137.4 (C<sub>m-py</sub>), 134.4 (C<sub>p-py</sub>), 125.1 (C<sub>m-py</sub>), 7.3 (CH<sub>3</sub>) ppm. ESI MS (HRMS): calculated: 243.1246 amu ([M+H]<sup>+</sup>); found: 243.1247 amu ([M+H]<sup>+</sup>). EI MS (EI<sup>+</sup>, 70 eV): m/z (%) = 243.1 ([M + H]<sup>+</sup>, 8), 242.1 ([M]<sup>+</sup>, 48), 135.1 ([M + H – C<sub>6</sub>H<sub>8</sub>N<sub>2</sub>]<sup>+</sup>, 30), 134.1 ([M – C<sub>6</sub>H<sub>8</sub>N<sub>2</sub>]<sup>+</sup>, 26), 108.1 ([C<sub>6</sub>H<sub>8</sub>N<sub>2</sub>]<sup>+</sup>, 100), 92.1 ([C<sub>6</sub>H<sub>6</sub>N]<sup>+</sup>, 7), 80.1 ([Py + H]<sup>+</sup>, 12). m.p. > 250 °C.

**1,3-bis(5-methylpyridin-3-yl)urea 12** (C<sub>13</sub>H<sub>14</sub>N<sub>4</sub>O; 242.28 g/mol): Using the general synthetic procedure 1 419.84 mg (1.73 mmol, 75 % c.y.) of **12** were obtained as a white powder. <sup>1</sup>H NMR (250 MHz, DMSO-*d*<sub>6</sub>, 303 K): δ = 8.91 (s, 2 H, NH), 8.41 (s, 2 H, H<sub>o-py</sub>), 8.05 (s, 2 H, H<sub>o-py</sub>), 7.79 (s, 2 H, H<sub>p-py</sub>), 2.28 (s, 6 H, CH<sub>3</sub>) ppm. <sup>13</sup>C NMR (63 MHz, DMSO-*d*<sub>6</sub>, 303 K): δ = 152.6 (CO), 143.39 (C<sub>o-py</sub>), 137.4 (C<sub>o-py</sub>), 135.8 (C<sub>m-py</sub>), 132.8 (C<sub>p-py</sub>), 125.7 (C<sub>m-py</sub>), 17.9 (CH<sub>3</sub>) ppm. ESI MS (HRMS): calculated: 243.1245 amu ([M+H]<sup>+</sup>); found: 243.1247 amu ([M+H]<sup>+</sup>). EI MS (EI<sup>+</sup>, 80 eV): m/z (%) = 241.9 ([M]<sup>+</sup>, 16), 134.9 ([M + H – C<sub>6</sub>H<sub>8</sub>N<sub>2</sub>]<sup>+</sup>, 14), 133.8 ([M – C<sub>6</sub>H<sub>8</sub>N<sub>2</sub>]<sup>+</sup>, 61), 108.0 ([C<sub>6</sub>H<sub>8</sub>N<sub>2</sub>]<sup>+</sup>, 100), 92.2 ([C<sub>6</sub>H<sub>6</sub>N]<sup>+</sup>, 5), 80.2 ([Py + H]<sup>+</sup>, 27). m.p. > 250 °C.

**1,3-bis(6-methylpyridin-3-yl)urea 13** ( $C_{13}H_{14}N_4O$ ; 242.28 g/mol): Using the general synthetic procedure 1 520.43 mg (2.15 mmol, 93 % c.y.) of **13** were obtained as a white powder.  $^1H$  NMR (500 MHz, DMSO- $d_6$ , 303 K):  $\delta$  = 8.61 (s, 2 H, NH), 8.47 (d, 2 H,  $^4J_{HH}$  = 2.6 Hz,  $H_{o-py}$ ), 7.78 (dd, 2 H,  $^3J_{HH}$  = 8.4 Hz and  $^4J_{HH}$  = 2.6 Hz,  $H_{p-py}$ ), 7.15 (d, 2 H,  $^3J_{HH}$  = 8.4 Hz,  $H_{m-py}$ ), 2.41 (s, 6 H,  $CH_3$ ) ppm.  $^{13}C$  NMR (126 MHz, DMSO- $d_6$ , 303 K):  $\delta$  = 152.5 (CO), 150.9 ( $C_{o-py}$ ), 139.4 ( $C_{o-py}$ ), 133.3 ( $C_{m-py}$ ), 126.0 ( $C_{p-py}$ ), 122.2 ( $C_{m-py}$ ), 22.7 ( $CH_3$ ) ppm. ESI MS (HRMS): calculated: 243.1246 amu ( $[M+H]^+$ ); found: 243.1242 amu ( $[M+H]^+$ ). EI MS ( $El^+$ , 80 eV):  $m/z$  (%) = 242.1 ( $[M]^+$ , 17), 134.9 ( $[M + H - C_6H_8N_2]^+$ , 13), 133.8 ( $[M - C_6H_8N_2]^+$ , 76), 108.0 ( $[C_6H_8N_2]^+$ , 100), 92.2 ( $[C_6H_6N]^+$ , 4), 80.2 ( $[Py + H]^+$ , 38). m.p. > 250 °C.

**1,3-bis((pyridin-3-yl)methyl)urea 14** ( $C_{13}H_{14}N_4O$ ; 242.28 g/mol): Using the general synthetic procedure 1 503.64 mg (2.08 mmol, 90 % c.y.) of **14** were obtained as a white powder.  $^1H$  NMR (400 MHz, DMSO- $d_6$ , 298 K):  $\delta$  = 8.47 (s, 2 H,  $H_{o-py}$ ), 8.42 (d, 2 H,  $^3J_{HH}$  = 4.8,  $H_{o-py}$ ), 7.63 (d, 2 H,  $^3J_{HH}$  = 7.6 Hz,  $H_{p-py}$ ), 7.32 (dd, 2 H,  $^3J_{HH}$  = 7.6 Hz,  $^3J_{HH}$  = 4.8 Hz,  $H_{m-py}$ ), 6.63 (t, 2 H,  $^3J_{HH}$  = 6.0 Hz, NH), 4.24 (d, 4 H,  $^3J_{HH}$  = 6.0 Hz,  $CH_2$ ) ppm.  $^{13}C$  NMR (100 MHz, DMSO- $d_6$ , 298 K):  $\delta$  = 158.1 (CO), 148.6 ( $C_{o-py}$ ), 147.9 ( $C_{o-py}$ ), 136.3 ( $C_{m-py}$ ), 134.9 ( $C_{p-py}$ ), 123.4 ( $C_{m-py}$ ), 40.7 ( $CH_2$ ) ppm. ESI MS (HRMS): calculated: 243.1246 amu ( $[M+H]^+$ ); found: 243.1241 amu ( $[M+H]^+$ ). EI MS ( $El^+$ , 70 eV):  $m/z$  (%) = 243.2 ( $[M + H]^+$ , 16), 242.1 ( $[M]^+$ , 100), 150.1 ( $[M - C_6H_6N]^+$ , 10), 135.0 ( $[M + H - C_6H_8N_2]^+$ , 13), 134.0 ( $[M - C_6H_8N_2]^+$ , 7), 107.0 ( $[C_6H_7N_2]^+$ , 59), 93.0 ( $[C_6H_7N]^+$ , 24), 92.0 ( $[C_6H_6N]^+$ , 27), 80.0 ( $[Py + H]^+$ , 16), 79.0 ( $[Py]^+$ , 9), 65.0 ( $[C_5H_5]^+$ , 11). m.p. > 250 °C.

**1,3-bis((pyridin-4-yl)methyl)urea 15** ( $C_{13}H_{14}N_4O$ ; 242.28 g/mol): Using the general synthetic procedure 1 307.52 mg (1.27 mmol, 55 % c.y.) **15** were obtained as a white powder.  $^1H$  NMR (300 MHz, DMSO- $d_6$ , 298 K):  $\delta$  = 8.49 (d, 4 H,  $^3J_{HH}$  = 5.7 Hz,  $H_{o-py}$ ), 7.24 (d, 4 H,  $^3J_{HH}$  = 5.7 Hz,  $H_{m-py}$ ), 6.73 (t, 2 H,  $^3J_{HH}$  = 6.1 Hz, NH), 4.26 (d, 4 H,  $^3J_{HH}$  = 6.1 Hz,  $CH_2$ ) ppm.  $^{13}C$  NMR (76 MHz, DMSO- $d_6$ , 298 K):  $\delta$  = 158.1 (CO), 150.0 ( $C_{p-py}$ ), 149.4 ( $C_{o-py}$ ), 121.9 ( $C_{m-py}$ ), 42.1 ( $CH_2$ ) ppm. ESI MS (HRMS): calculated: 243.1246 amu ( $[M+H]^+$ ); found: 243.1248 amu ( $[M+H]^+$ ). EI MS ( $El^+$ , 70 eV):  $m/z$  (%) = 243.2 ( $[M + H]^+$ , 16), 242.1 ( $[M]^+$ , 100), 150.1 ( $[M - C_6H_6N]^+$ , 3), 135.0 ( $[M + H - C_6H_8N_2]^+$ , 12), 134.0 ( $[M - C_6H_8N_2]^+$ , 12), 107.0 ( $[C_6H_7N_2]^+$ , 35), 93.0 ( $[C_6H_7N]^+$ , 13), 92.0 ( $[C_6H_6N]^+$ , 15), 80.0 ( $[Py + H]^+$ , 15), 79.0 ( $[Py]^+$ , 12), 65.0 ( $[C_5H_5]^+$ , 6). m.p. > 250 °C.

## 1.2 Self-assembly of metallo-supramolecular complexes

### General procedure for the synthesis of water-soluble complexes with (en)Pd(NO<sub>3</sub>)<sub>2</sub>:

2 mg of the ligands **9** - **15**, respectively, were mixed with an equimolar amount of (en)Pd(NO<sub>3</sub>)<sub>2</sub> **16**. These mixtures were dissolved in H<sub>2</sub>O, D<sub>2</sub>O, DMSO or DMSO-*d*<sub>6</sub>, respectively, and stirred for one hour at r.t. The solutions were then used without workup to examine the systems under study. No discrete complexes were observed with ligands **10** and **13**.

Numbers given in parenthesis for the signals of the ESI mass spectra refer to [number of metal centers including the cis-coordinated chelating ligand : number of dipyrdiylurea ligands : number of counterions].

**[(Pd(en))<sub>2</sub>(**9**)<sub>2</sub>](NO<sub>3</sub>)<sub>4</sub> **19a**** (C<sub>26</sub>H<sub>36</sub>N<sub>16</sub>O<sub>14</sub>Pd<sub>2</sub>; 1008.07 g/mol): <sup>1</sup>H NMR (DMSO-*d*<sub>6</sub>, 400 MHz, 298 K): δ = 9.82 (s, 4 H, H<sub>o</sub>-pyridine), 9.61 (s, 4 H, NH<sub>urea</sub>), 8.61 (dd, <sup>3</sup>J<sub>HH</sub> = 4.8 Hz, <sup>4</sup>J<sub>HH</sub> = 1.8 Hz, 4 H, H<sub>o</sub>-pyridine), 7.58 (m, 8 H, H<sub>m</sub>-pyridine and H<sub>p</sub>-pyridine), 5.59 (s, 8 H, (NH<sub>2</sub>)<sub>en</sub>), 2.69 (s, 8 H, (CH<sub>2</sub>)<sub>en</sub>) ppm. ESI MS (ESI<sup>+</sup>, DMSO/acetonitrile): *m/z* = 948 ([2:2:3]<sup>+</sup>), 443 ([2:2:2]<sup>2+</sup>).

**[(Pd(en))<sub>2</sub>(**11**)<sub>2</sub>](NO<sub>3</sub>)<sub>4</sub> **20**** (C<sub>30</sub>H<sub>44</sub>N<sub>16</sub>O<sub>14</sub>Pd<sub>2</sub>; 1064.13 g/mol): <sup>1</sup>H NMR (DMSO-*d*<sub>6</sub>, 400 MHz, 298 K): δ = 9.58 (s, H<sub>o</sub>-pyridine), 8.92 (s, NH<sub>urea</sub>), 8.48 (d, <sup>3</sup>J<sub>HH</sub> = 5.8 Hz, H<sub>o</sub>-pyridine), 7. (d, <sup>3</sup>J<sub>HH</sub> = 5.8 Hz, H<sub>m</sub>-pyridine), 5.57 (s, (NH<sub>2</sub>)<sub>en</sub>); 2.89 (s, (CH<sub>2</sub>)<sub>en</sub>), 2.33 (s, CH<sub>3</sub>) ppm. ESI MS (ESI<sup>+</sup>, DMSO/acetonitrile): *m/z* = 1004 ([2:2:3]<sup>+</sup> and [4:4:6]<sup>2+</sup>), 972 ([4:4:6] – HNO<sub>3</sub>)<sup>2+</sup>, 472 ([2:2:2]<sup>2+</sup>).

**[(Pd(en))<sub>2</sub>(**12**)<sub>2</sub>](NO<sub>3</sub>)<sub>4</sub> **21a**** (C<sub>30</sub>H<sub>44</sub>N<sub>16</sub>O<sub>14</sub>Pd<sub>2</sub>; 1064.13 g/mol): <sup>1</sup>H NMR (DMSO-*d*<sub>6</sub>, 250 MHz, 303 K): δ = 9.65 (d, <sup>4</sup>J<sub>HH</sub> = 2.0 Hz, H<sub>o</sub>-pyridine), 9.53 (s, NH<sub>urea</sub>), 8.49 (d, <sup>4</sup>J<sub>HH</sub> = 1.0 Hz, H<sub>o</sub>-pyridine), 7.36 (m, H<sub>p</sub>-pyridine), 5.55 (br, (NH<sub>2</sub>)<sub>en</sub>), 2.68 (br, (CH<sub>2</sub>)<sub>en</sub>), 2.31 (s, CH<sub>3</sub>) ppm. ESI MS (ESI<sup>+</sup>, DMSO/acetonitrile): *m/z* = 1004 ([2:2:3]<sup>+</sup> and [4:4:6]<sup>2+</sup>), 972 ([4:4:6] – HNO<sub>3</sub>)<sup>2+</sup>, 941 ([4:4:6] – 2 HNO<sub>3</sub>)<sup>2+</sup>, 648 ([4:4:5]<sup>3+</sup>), 472 ([1:1:1]<sup>+</sup> and [2:2:2]<sup>2+</sup>).

**[(Pd(en))<sub>2</sub>(**14**)<sub>2</sub>](NO<sub>3</sub>)<sub>4</sub> **22a**** (C<sub>30</sub>H<sub>44</sub>N<sub>16</sub>O<sub>14</sub>Pd<sub>2</sub>; 1064.13 g/mol): <sup>1</sup>H NMR (DMSO-*d*<sub>7</sub>, 500 MHz, 298 K): δ = 8.65 (d, <sup>3</sup>J<sub>HH</sub> = 5.5 Hz, H<sub>o</sub>-pyridine), 8.56 (s, H<sub>o</sub>-pyridine), 7.86 (d, <sup>3</sup>J<sub>HH</sub> = 7.8 Hz, H<sub>p</sub>-pyridine), 7.86 (dd, <sup>3</sup>J<sub>HH</sub> = 7.8 Hz, <sup>3</sup>J<sub>HH</sub> = 5.5 Hz, H<sub>m</sub>-pyridine), (t, <sup>3</sup>J<sub>HH</sub> = 5.9 Hz, NH<sub>urea</sub>), 5.58

(s, (NH<sub>2</sub>)<sub>en</sub>), 4.19 (d, <sup>3</sup>J<sub>HH</sub> = 5.9 Hz, (CH<sub>2</sub>)<sub>urea</sub>), 2.67 (s, (CH<sub>2</sub>)<sub>en</sub>) ppm. ESI MS (ESI<sup>+</sup>, DMSO/acetonitrile): *m/z* = 1004 ([2:2:3]<sup>+</sup>), 761 ([2:1:3]<sup>+</sup>), 472 ([1:1:1]<sup>+</sup> and [2:2:2]<sup>2+</sup>).

**[(Pd(en))<sub>2</sub>(15)<sub>2</sub>](NO<sub>3</sub>)<sub>4</sub> 23a** (C<sub>30</sub>H<sub>44</sub>N<sub>16</sub>O<sub>14</sub>Pd<sub>2</sub>; 1064.13 g/mol): <sup>1</sup>H NMR (DMSO-*d*<sub>7</sub>, 500 MHz, 298 K): δ = 8.77 (d, <sup>3</sup>J<sub>HH</sub> = 6.0 Hz, H<sub>o</sub>-pyridine), 7.42 (d, <sup>3</sup>J<sub>HH</sub> = 6.0 Hz, H<sub>m</sub>-pyridine), 6.90 (t, <sup>3</sup>J<sub>HH</sub> = 5.5 Hz, NH<sub>urea</sub>), 5.56 (s, (NH<sub>2</sub>)<sub>en</sub>), 4.29 (d, <sup>3</sup>J<sub>HH</sub> = 5.5 Hz, (CH<sub>2</sub>)<sub>urea</sub>), 2.67 (s, (CH<sub>2</sub>)<sub>en</sub>) ppm. ESI MS (ESI<sup>+</sup>, DMSO/acetonitrile): *m/z* = 1004 ([2:2:3]<sup>+</sup> and [4:4:6]<sup>2+</sup>), 882 ([4:3:6]<sup>2+</sup>), 761 ([2:1:3]<sup>+</sup>), 472 ([1:1:1]<sup>+</sup> and [2:2:2]<sup>2+</sup>).

**General procedure for the synthesis of complexes containing (dppp)M(OTf)<sub>2</sub> (M = Pd<sup>2+</sup> 17 or M = Pt<sup>2+</sup> 18):**

2 mg of the ligands **9** - **15** were mixed with an equimolar amount of (dppp)Pd(OTf)<sub>2</sub> (**17**) or (dppp)Pt(OTf)<sub>2</sub> (**18**), respectively. These mixtures were dissolved in DMSO, DMSO-*d*<sub>6</sub>, DMF or DMF-*d*<sub>7</sub>, respectively, and stirred for one hour (mixtures containing **17**) or one day (mixtures containing **18**) at r.t. The solutions were then used without workup to examine the systems under study. No discrete complexes were observed using ligands **10** and **13**.

**[(Pd(dppp))<sub>2</sub>(9)<sub>2</sub>](OTf)<sub>4</sub> 24a** (C<sub>80</sub>H<sub>72</sub>F<sub>12</sub>N<sub>8</sub>O<sub>14</sub>P<sub>4</sub>Pd<sub>2</sub>S<sub>4</sub>; 2062.45 g/mol; M<sub>2</sub>L<sub>2</sub>) and **[(Pd(dppp))<sub>3</sub>(9)<sub>3</sub>](OTf)<sub>6</sub> 24b** (C<sub>120</sub>H<sub>108</sub>F<sub>18</sub>N<sub>12</sub>O<sub>21</sub>P<sub>6</sub>Pd<sub>3</sub>S<sub>6</sub>; 3093.67 g/mol; M<sub>3</sub>L<sub>3</sub>): <sup>1</sup>H NMR (DMF-*d*<sub>7</sub>, 500 MHz, 273 K): δ = 9.81 (s, H<sub>o</sub>-pyridine, M<sub>2</sub>L<sub>2</sub>); 9.43 (s, H<sub>o</sub>-pyridine, M<sub>3</sub>L<sub>3</sub>); 9.17 (s, NH<sub>urea</sub>, M<sub>2</sub>L<sub>2</sub>); 9.11 (d, <sup>3</sup>J<sub>HH</sub> = 4.7 Hz, H<sub>o</sub>-pyridine, M<sub>2</sub>L<sub>2</sub>), 9.07 (d, <sup>3</sup>J<sub>HH</sub> = 4.6 Hz, H<sub>o</sub>-pyridine, M<sub>3</sub>L<sub>3</sub>), 8.68 (s, NH<sub>urea</sub>, M<sub>3</sub>L<sub>3</sub>), 8.53 (m, H<sub>m</sub>-pyridine, M<sub>2</sub>L<sub>2</sub>), 8.22 (m, H<sub>m</sub>-pyridine (M<sub>3</sub>L<sub>3</sub>) and H<sub>p</sub>-pyridine (M<sub>2</sub>L<sub>2</sub>)), 7.15-8.26 (m, H<sub>p</sub>-pyridine (M<sub>3</sub>L<sub>3</sub>) and H<sub>dppp</sub>-phenyl, M<sub>2</sub>L<sub>2</sub> and M<sub>3</sub>L<sub>3</sub>), 3.28 (m, (PCH<sub>2</sub>)<sub>dppp</sub>, M<sub>2</sub>L<sub>2</sub> and M<sub>3</sub>L<sub>3</sub>); 1.72 (m, (PCH<sub>2</sub>CH<sub>2</sub>)<sub>dppp</sub>, M<sub>2</sub>L<sub>2</sub> and M<sub>3</sub>L<sub>3</sub>) ppm. <sup>31</sup>P NMR (DMF-*d*<sub>7</sub>, 202 MHz, 303 K): δ = 9.8 (s, P<sub>dppp</sub>, M<sub>3</sub>L<sub>3</sub>), 9.3 (s, P<sub>dppp</sub>, M<sub>2</sub>L<sub>2</sub>) ppm. ESI MS (ESI<sup>+</sup>, DMSO/acetonitrile): *m/z* = 1913 ([2:2:3]<sup>+</sup> and [4:4:6]<sup>2+</sup>), 1226 ([4:4:5]<sup>3+</sup>), 1095 ([1:2:1]<sup>+</sup>), 882 ([1:1:1]<sup>+</sup> and [2:2:2]<sup>2+</sup>). ESI MS (ESI<sup>+</sup>, DMF): *m/z* = 2944 ([3:3:5]<sup>+</sup> and [6:6:10]<sup>2+</sup>), 2730 ([3:2:5]<sup>+</sup>), 1913 ([2:2:3]<sup>+</sup> and [4:4:6]<sup>2+</sup>), 1504 ([3:4:4]<sup>2+</sup>), 1398 ([3:3:4]<sup>2+</sup>), 1095 ([1:2:1]<sup>+</sup>), 882 ([1:1:1]<sup>+</sup> and [2:2:2]<sup>2+</sup>), 667 ([1:0:1]<sup>+</sup>).

**[(Pd(dppp))<sub>2</sub>(11)<sub>2</sub>](OTf)<sub>4</sub> 25a** (C<sub>84</sub>H<sub>80</sub>F<sub>12</sub>N<sub>8</sub>O<sub>14</sub>P<sub>4</sub>Pd<sub>2</sub>S<sub>4</sub>; 2116.62 g/mol; M<sub>2</sub>L<sub>2</sub>) and **[(Pd(dppp))<sub>3</sub>(11)<sub>3</sub>](OTf)<sub>6</sub> 25b** (C<sub>126</sub>H<sub>84</sub>F<sub>18</sub>N<sub>12</sub>O<sub>21</sub>P<sub>6</sub>Pd<sub>3</sub>S<sub>6</sub>; 3141.55 g/mol; M<sub>3</sub>L<sub>3</sub>): <sup>1</sup>H NMR (DMF-*d*<sub>7</sub>, 500 MHz, 298 K): δ = 9.70 (s, H<sub>o</sub>-pyridine, M<sub>2</sub>L<sub>2</sub>), 9.17 (s, H<sub>o</sub>-pyridine, M<sub>3</sub>L<sub>3</sub>), 8.96 (s,



NH<sub>urea</sub>, M<sub>2</sub>L<sub>2</sub>), 8.81 (m, H<sub>o</sub>-pyridine (M<sub>2</sub>L<sub>2</sub>) and NH (M<sub>3</sub>L<sub>3</sub>)), 8.63 (s H<sub>o</sub>-pyridine, M<sub>3</sub>L<sub>3</sub>), 8.41 (m, H<sub>dppp</sub>-phenyl, M<sub>2</sub>L<sub>2</sub>), 7.93 (m, H<sub>dppp</sub>-phenyl, M<sub>3</sub>L<sub>3</sub>), 7.84-7.27 (m, H<sub>p</sub>-pyridine (M<sub>3</sub>L<sub>3</sub>) and H<sub>dppp</sub>-phenyl, M<sub>2</sub>L<sub>2</sub> and M<sub>3</sub>L<sub>3</sub>), 7.03 (s, H<sub>p</sub>-pyridine, M<sub>2</sub>L<sub>2</sub>); 3.32 (m, (PCH<sub>2</sub>)<sub>dppp</sub>, M<sub>2</sub>L<sub>2</sub> and M<sub>3</sub>L<sub>3</sub>); 2.29 (m, (PCH<sub>2</sub>CH<sub>2</sub>)<sub>dppp</sub>, M<sub>2</sub>L<sub>2</sub> and M<sub>3</sub>L<sub>3</sub>); 2.17 (br., CH<sub>3</sub>, M<sub>2</sub>L<sub>2</sub> and M<sub>3</sub>L<sub>3</sub>) ppm. <sup>31</sup>P NMR (DMF-*d*<sub>7</sub>, 202 MHz, 298 K): δ = 10.1 (s, P<sub>dppp</sub>, M<sub>3</sub>L<sub>3</sub>), 9.7 (s, P<sub>dppp</sub>, M<sub>2</sub>L<sub>2</sub>) ppm. ESI MS (ESI<sup>+</sup>, DMSO/acetonitrile): *m/z* = 1969 ([2:2:3]<sup>+</sup>), 910 ([1:1:1]<sup>+</sup> and [2:2:2]<sup>2+</sup>). ESI MS (ESI<sup>+</sup>, DMF): *m/z* = 3028 ([3:3:5]<sup>+</sup> and [6:6:10]<sup>2+</sup>), 2211 ([2:3:3]<sup>+</sup>), 1969 ([2:2:3]<sup>+</sup> and [4:4:6]<sup>2+</sup>), 1559 ([3:4:4]<sup>2+</sup>), 1439 ([3:3:4]<sup>2+</sup>), 1151 ([1:2:1]<sup>+</sup>), 910 ([1:1:1]<sup>+</sup> and [2:2:2]<sup>2+</sup>), 667 ([1:0:1]<sup>+</sup>).

**[(Pd(dppp))<sub>2</sub>(12)<sub>2</sub>](OTf)<sub>4</sub> 26a** (C<sub>84</sub>H<sub>80</sub>F<sub>12</sub>N<sub>8</sub>O<sub>14</sub>P<sub>4</sub>Pd<sub>2</sub>S<sub>4</sub>; 2116.62 g/mol; M<sub>2</sub>L<sub>2</sub>) and **[(Pd(dppp))<sub>3</sub>(12)<sub>3</sub>](OTf)<sub>6</sub> 26b** (C<sub>126</sub>H<sub>84</sub>F<sub>18</sub>N<sub>12</sub>O<sub>21</sub>P<sub>6</sub>Pd<sub>3</sub>S<sub>6</sub>; 3141.55 g/mol; M<sub>3</sub>L<sub>3</sub>): <sup>1</sup>H NMR (DMF-*d*<sub>7</sub>, 500 MHz, 298 K): δ = 9.70 (s, H<sub>o</sub>-pyridine, M<sub>2</sub>L<sub>2</sub>), 9.17 (s, H<sub>o</sub>-pyridine, M<sub>3</sub>L<sub>3</sub>), 8.97 (s, H<sub>o</sub>-pyridine, M<sub>2</sub>L<sub>2</sub>), 8.81 (m, NH<sub>urea</sub> (M<sub>2</sub>L<sub>2</sub>) and H<sub>o</sub>-pyridine (M<sub>3</sub>L<sub>3</sub>)), 8.63 (s, H<sub>p</sub>-pyridine, M<sub>3</sub>L<sub>3</sub>), 8.41 (br., NH<sub>urea</sub>, M<sub>3</sub>L<sub>3</sub>), 8.00-7.30 (m, H<sub>dppp</sub>-phenyl), 7.03 (s, H<sub>p</sub>-pyridine, M<sub>2</sub>L<sub>2</sub>), 3.40-3.20 (m, (PCH<sub>2</sub>)<sub>dppp</sub>, M<sub>2</sub>L<sub>2</sub> and M<sub>3</sub>L<sub>3</sub>); 2.42-1.92 (m, CH<sub>3</sub> and (PCH<sub>2</sub>CH<sub>2</sub>)<sub>dppp</sub>, M<sub>2</sub>L<sub>2</sub> and M<sub>3</sub>L<sub>3</sub>) ppm. <sup>31</sup>P NMR (DMF-*d*<sub>7</sub>, 202 MHz, 298 K): δ = 6.3 (s, P<sub>dppp</sub>, M<sub>3</sub>L<sub>3</sub>), 6.0 (s, P<sub>dppp</sub>, M<sub>2</sub>L<sub>2</sub>) ppm. ESI MS (ESI<sup>+</sup>, DMSO/acetonitrile): *m/z* = 910 ([1:1:1]<sup>+</sup> and [2:2:2]<sup>2+</sup>), 667 ([1:0:1]<sup>+</sup>), 557 ([2:2:1]<sup>3+</sup>), 501 ([1:2:0]<sup>2+</sup>). ESI MS (ESI<sup>+</sup>, DMF): *m/z* = 3028 ([3:3:5]<sup>+</sup> and [6:6:10]<sup>2+</sup>), 2211 ([2:3:3]<sup>+</sup>), 1969 ([2:2:3]<sup>+</sup> and [4:4:6]<sup>2+</sup>), 1559 ([3:4:4]<sup>2+</sup>), 1439 ([3:3:4]<sup>2+</sup>), 1151 ([1:2:1]<sup>+</sup>), 910 ([1:1:1]<sup>+</sup> and [2:2:2]<sup>2+</sup>), 667 ([1:0:1]<sup>+</sup>).

**[(Pd(dppp))<sub>2</sub>(14)<sub>2</sub>](OTf)<sub>4</sub> 27a** (C<sub>84</sub>H<sub>80</sub>F<sub>12</sub>N<sub>8</sub>O<sub>14</sub>P<sub>4</sub>Pd<sub>2</sub>S<sub>4</sub>; 2116.62 g/mol; M<sub>2</sub>L<sub>2</sub>) and **[(Pd(dppp))<sub>3</sub>(14)<sub>3</sub>](OTf)<sub>6</sub> 27b** (C<sub>126</sub>H<sub>84</sub>F<sub>18</sub>N<sub>12</sub>O<sub>21</sub>P<sub>6</sub>Pd<sub>3</sub>S<sub>6</sub>; 3141.55 g/mol; M<sub>3</sub>L<sub>3</sub>): <sup>1</sup>H NMR (DMF-*d*<sub>7</sub>, 500 MHz, 273K): δ = 9.09 (m, H<sub>o</sub>-pyridine), 8.53 (s, H<sub>o</sub>-pyridine), 8.33 (m, H<sub>dppp</sub>-phenyl), 8.00-7.15 (m, H<sub>dppp</sub>-phenyl and NH<sub>urea</sub>), 6.78 (m, H<sub>m</sub>-pyridine), 4.12 (m, NCH<sub>2</sub>), 3.76 (m, NCH<sub>2</sub>), 3.36 (m, (PCH<sub>2</sub>)<sub>dppp</sub>, M<sub>2</sub>L<sub>2</sub> and M<sub>3</sub>L<sub>3</sub>), 1.79 (m, (PCH<sub>2</sub>CH<sub>2</sub>)<sub>dppp</sub>, M<sub>2</sub>L<sub>2</sub> and M<sub>3</sub>L<sub>3</sub>) ppm. <sup>31</sup>P NMR (DMF-*d*<sub>7</sub>, 202 MHz, 233 K): δ = 10.7 (s, P<sub>dppp</sub>, M<sub>3</sub>L<sub>3</sub>), 10.5 (s, P<sub>dppp</sub>, M<sub>2</sub>L<sub>2</sub>) ppm. ESI MS (ESI<sup>+</sup>, DMSO/acetonitrile): *m/z* = 910 ([1:1:1]<sup>+</sup> and [2:2:2]<sup>2+</sup>), 667 ([1:0:1]<sup>+</sup>), 557 ([2:2:1]<sup>3+</sup>), 501 ([1:2:0]<sup>2+</sup>), 380 ([1:1:0]<sup>2+</sup>). ESI MS (ESI<sup>+</sup>, DMF): *m/z* = 3028 ([3:3:5]<sup>+</sup> and [6:6:10]<sup>2+</sup>), 2211 ([2:3:3]<sup>+</sup>), 1969 ([2:2:3]<sup>+</sup> and [4:4:6]<sup>2+</sup>), 1439 ([3:3:4]<sup>2+</sup>), 1151 ([1:2:1]<sup>+</sup>), 910 ([1:1:1]<sup>+</sup> and [2:2:2]<sup>2+</sup>).

**[(Pd(dppp))<sub>2</sub>(15)<sub>2</sub>](OTf)<sub>4</sub> 28a** (C<sub>84</sub>H<sub>80</sub>F<sub>12</sub>N<sub>8</sub>O<sub>14</sub>P<sub>4</sub>Pd<sub>2</sub>S<sub>4</sub>; 2116.62 g/mol; M<sub>2</sub>L<sub>2</sub>): <sup>1</sup>H NMR (DMF-*d*<sub>7</sub>, 500 MHz, 303 K): δ = 8.81 (d, <sup>3</sup>J<sub>HH</sub> = 4.9 Hz, H<sub>o</sub>-pyridine), 7.77 (m, H<sub>dppp</sub>-phenyl), 7.60



(m, H<sub>dppp-phenyl</sub>), 7.50 (m, H<sub>dppp-phenyl</sub>), 7.07 (d,  $^3J_{\text{HH}} = 4.9$  Hz, H<sub>m-pyridine</sub>), 6.88 (m, NH<sub>urea</sub>), 4.18 (d,  $^3J_{\text{HH}} = 5.50$  Hz, CH<sub>2</sub>), 3.37 (m, (PCH<sub>2</sub>)<sub>dppp</sub>), 1.72 (m, (m, PCH<sub>2</sub>CH<sub>2</sub>)<sub>dppp</sub>) ppm.  $^{31}\text{P}$  NMR (DMF-*d*<sub>7</sub>; 202 MHz; 303 K):  $\delta = 9.2$  (s, P<sub>dppp</sub>) ppm. ESI MS (ESI<sup>+</sup>, DMSO/acetonitrile):  $m/z = 910$  ([1:1:1]<sup>+</sup> and [2:2:2]<sup>2+</sup>), 667 ([1:0:1]<sup>+</sup>), 557 ([2:2:1]<sup>3+</sup>), 501 ([1:2:0]<sup>2+</sup>), 380 ([1:1:0]<sup>2+</sup>). ESI MS (ESI<sup>+</sup>, DMF):  $m/z = 1969$  ([2:2:3]<sup>+</sup> and [4:4:6]<sup>2+</sup>), 1151 ([1:2:1]<sup>+</sup>), 910 ([1:1:1]<sup>+</sup> and [2:2:2]<sup>2+</sup>), 667 ([1:0:1]<sup>+</sup>).

**[(Pt(dppp))<sub>2</sub>(9)<sub>2</sub>](OTf)<sub>4</sub> 29a** (C<sub>80</sub>H<sub>72</sub>F<sub>12</sub>N<sub>8</sub>O<sub>14</sub>P<sub>4</sub>Pt<sub>2</sub>S<sub>4</sub>; 2239.76 g/mol; M<sub>2</sub>L<sub>2</sub>) and **[(Pt(dppp))<sub>3</sub>(9)<sub>3</sub>](OTf)<sub>6</sub> 29b** (C<sub>120</sub>H<sub>108</sub>F<sub>18</sub>N<sub>12</sub>O<sub>21</sub>P<sub>6</sub>Pt<sub>3</sub>S<sub>6</sub>; 3359.65 g/mol; M<sub>3</sub>L<sub>3</sub>):  $^1\text{H}$  NMR (DMF-*d*<sub>7</sub>, 500 MHz, 298 K):  $\delta = 9.71$  (m, NH<sub>urea</sub>, M<sub>2</sub>L<sub>2</sub>), 9.38 (s, H<sub>o-pyridine</sub>, M<sub>3</sub>L<sub>3</sub>), 9.18 (s, H<sub>o-pyridine</sub>, M<sub>2</sub>L<sub>2</sub>), 9.13 (d,  $^3J_{\text{HH}} = 4.89$  Hz, H<sub>o-pyridine</sub>, M<sub>2</sub>L<sub>2</sub>), 9.07 (d,  $^3J_{\text{HH}} = 4.89$  Hz, H<sub>o-pyridine</sub>, M<sub>3</sub>L<sub>3</sub>), 8.72 (m, NH<sub>urea</sub>, M<sub>3</sub>L<sub>3</sub>), 8.54 (m, H<sub>dppp-phenyl</sub>, M<sub>2</sub>L<sub>2</sub>), 8.20 (m, H<sub>dppp-phenyl</sub>, M<sub>3</sub>L<sub>3</sub>), 7.76-7.26 (m, H<sub>dppp-phenyl</sub> and H<sub>m-pyridine</sub> and H<sub>p-pyridine</sub>, M<sub>2</sub>L<sub>2</sub> and M<sub>3</sub>L<sub>3</sub>), 3.71 (m, (PCH<sub>2</sub>)<sub>dppp</sub>, M<sub>2</sub>L<sub>2</sub> and M<sub>3</sub>L<sub>3</sub>), 3.37 (m, PCH<sub>2</sub>, M<sub>2</sub>L<sub>2</sub> and M<sub>3</sub>L<sub>3</sub>), 2.95 (m, (PCH<sub>2</sub>CH<sub>2</sub>)<sub>dppp</sub>, M<sub>2</sub>L<sub>2</sub> and M<sub>3</sub>L<sub>3</sub>) ppm.  $^{31}\text{P}$  NMR (DMF-*d*<sub>7</sub>, 202 MHz, 298K):  $\delta = -15.81$  (s, P<sub>dppp</sub>,  $^1J_{\text{Pt-P}} = 3000$  Hz, M<sub>3</sub>L<sub>3</sub>), -16.13 (s, P<sub>dppp</sub>,  $^1J_{\text{Pt-P}} = 3000$  Hz, M<sub>3</sub>L<sub>3</sub>) ppm. ESI MS (ESI<sup>+</sup>, DMSO/acetonitrile):  $m/z = 2090$  ([2:2:3]<sup>+</sup>, 1344 ([4:4:5]<sup>3+</sup>), 970 ([2:2:2]<sup>2+</sup>). ESI MS (ESI<sup>+</sup>, DMF):  $m/z = 3210$  ([3:3:5]<sup>+</sup> and [6:6:10]<sup>2+</sup>), 2090 ([2:2:3]<sup>+</sup> and [4:4:6]<sup>2+</sup>), 1637 ([3:4:4]<sup>2+</sup>), 1530 ([3:3:4]<sup>2+</sup>), 1344 ([4:4:5]<sup>3+</sup>), 1184 ([1:2:1]<sup>+</sup>), 970 ([1:1:1]<sup>+</sup> and [2:2:2]<sup>2+</sup>), 756 ([1:0:1]<sup>+</sup>).

**[(Pt(dppp))<sub>2</sub>(11)<sub>2</sub>](OTf)<sub>4</sub> 30a** (C<sub>84</sub>H<sub>80</sub>F<sub>12</sub>N<sub>8</sub>O<sub>14</sub>P<sub>4</sub>Pt<sub>2</sub>S<sub>4</sub>; 2295.87 g/mol; M<sub>2</sub>L<sub>2</sub>) and **[(Pt(dppp))<sub>3</sub>(11)<sub>3</sub>](OTf)<sub>6</sub> 30b** (C<sub>126</sub>H<sub>84</sub>F<sub>18</sub>N<sub>12</sub>O<sub>21</sub>P<sub>6</sub>Pt<sub>3</sub>S<sub>6</sub>; 3407.52 g/mol; M<sub>3</sub>L<sub>3</sub>):  $^1\text{H}$  NMR (DMF-*d*<sub>7</sub>, 500 MHz, 298 K):  $\delta = 9.58$  (s, H<sub>o-pyridine</sub>, M<sub>2</sub>L<sub>2</sub>), 9.07 (d,  $^3J_{\text{HH}} = 5.9$  Hz, H<sub>o-pyridine</sub>, M<sub>3</sub>L<sub>3</sub>), 9.02 (d,  $^3J_{\text{HH}} = 4.7$  Hz, H<sub>o-pyridine</sub>, M<sub>2</sub>L<sub>2</sub>), 8.56 (s, NH<sub>urea</sub>, M<sub>3</sub>L<sub>3</sub>), 8.49 (m, H<sub>dppp-phenyl</sub>, M<sub>2</sub>L<sub>2</sub>), 8.41 (m, NH<sub>urea</sub>, M<sub>2</sub>L<sub>2</sub>), 8.24 (m, H<sub>dppp-phenyl</sub>, M<sub>3</sub>L<sub>3</sub>), 8.22 (m, H<sub>o-pyridine</sub>, M<sub>3</sub>L<sub>3</sub>), 7.76-7.12 (m, H<sub>dppp-phenyl</sub> and H<sub>m-pyridine</sub>, M<sub>2</sub>L<sub>2</sub> and M<sub>3</sub>L<sub>3</sub>), 3.27 (m, (PCH<sub>2</sub>)<sub>dppp</sub>, M<sub>2</sub>L<sub>2</sub> and M<sub>3</sub>L<sub>3</sub>), 2.62 (m, (PCH<sub>2</sub>CH<sub>2</sub>)<sub>dppp</sub>, M<sub>2</sub>L<sub>2</sub> and M<sub>3</sub>L<sub>3</sub>), 2.29 (s, CH<sub>3</sub>, M<sub>3</sub>L<sub>3</sub>), 2.08 (s, CH<sub>3</sub>, M<sub>2</sub>L<sub>2</sub>) ppm.  $^{31}\text{P}$  NMR (DMF-*d*<sub>7</sub>, 121 MHz, 298K):  $\delta = -12.6$  (s, P<sub>dppp</sub>,  $^1J_{\text{Pt-P}} = 3021$  Hz, M<sub>2</sub>L<sub>2</sub>), -12.6 (s, P<sub>dppp</sub>,  $^1J_{\text{Pt-P}} = 3021$  Hz, M<sub>2</sub>L<sub>2</sub>) ppm. ESI MS (ESI<sup>+</sup>, DMSO/acetone):  $m/z = 2146$  ([2:2:3]<sup>+</sup>), 1381 ([4:4:5]<sup>3+</sup>), 998 ([2:2:2]<sup>2+</sup>), 616 ([2:2:1]<sup>3+</sup>). ESI MS (ESI<sup>+</sup>, DMF):  $m/z = 3291$  ([3:3:5]<sup>+</sup> and [6:6:10]<sup>2+</sup>), 2144 ([2:2:3]<sup>+</sup> and [4:4:6]<sup>2+</sup>), 1692 ([3:4:4]<sup>2+</sup>), 1570 ([3:3:4]<sup>2+</sup>), 1238 ([1:2:1]<sup>+</sup>), 998 ([1:1:1]<sup>+</sup> and [2:2:2]<sup>2+</sup>), 756 ([1:0:1]<sup>+</sup>), 616 ([2:2:1]<sup>3+</sup>).

**[(Pt(dppp))<sub>2</sub>(12)<sub>2</sub>](OTf)<sub>4</sub> 31a** (C<sub>84</sub>H<sub>80</sub>F<sub>12</sub>N<sub>8</sub>O<sub>14</sub>P<sub>4</sub>Pt<sub>2</sub>S<sub>4</sub>; 2295.87 g/mol; M<sub>2</sub>L<sub>2</sub>) and **[(Pt(dppp))<sub>3</sub>(12)<sub>3</sub>](OTf)<sub>6</sub> 31b** (C<sub>126</sub>H<sub>84</sub>F<sub>18</sub>N<sub>12</sub>O<sub>21</sub>P<sub>6</sub>Pt<sub>3</sub>S<sub>6</sub>; 3407.52 g/mol; M<sub>3</sub>L<sub>3</sub>): <sup>1</sup>H NMR (DMF-*d*<sub>7</sub>, 500 MHz, 298K): δ = 9.56 (s, H<sub>o</sub>-pyridine, M<sub>2</sub>L<sub>2</sub>), 9.27 (s, H<sub>o</sub>-pyridine, M<sub>3</sub>L<sub>3</sub>), 9.05 (s, H<sub>o</sub>-pyridine, M<sub>2</sub>L<sub>2</sub>), 8.90 (s, NH<sub>urea</sub>, M<sub>2</sub>L<sub>2</sub>), 8.80 (s, NH<sub>urea</sub>, M<sub>3</sub>L<sub>3</sub>), 8.66 (s, H<sub>o</sub>-pyridine, M<sub>3</sub>L<sub>3</sub>), 8.50 (m, H<sub>dppp</sub>-phenyl, M<sub>2</sub>L<sub>2</sub>), 7.94 (m, H<sub>dppp</sub>-phenyl, M<sub>3</sub>L<sub>3</sub>), 7.77-7.33 (m, H<sub>dppp</sub>-phenyl (M<sub>2</sub>L<sub>2</sub> and M<sub>3</sub>L<sub>3</sub>) and H<sub>p</sub>-pyridine, M<sub>3</sub>L<sub>3</sub>), 7.07 (s, H<sub>p</sub>-pyridine, M<sub>2</sub>L<sub>2</sub>), 3.71 (m, (PCH<sub>2</sub>)<sub>dppp</sub>, M<sub>2</sub>L<sub>2</sub> and M<sub>3</sub>L<sub>3</sub>), 2.16 (br., CH<sub>3</sub>), 2.08 (m, (PCH<sub>2</sub>CH<sub>2</sub>)<sub>dppp</sub>, M<sub>2</sub>L<sub>2</sub> and M<sub>3</sub>L<sub>3</sub>) ppm. <sup>31</sup>P NMR (DMF-*d*<sub>7</sub>, 202 MHz, 298 K): δ = -11.8 (s, P<sub>dppp</sub>, <sup>1</sup>J<sub>Pt-P</sub> = 3020 Hz, M<sub>3</sub>L<sub>3</sub>), -12.0 (s, P<sub>dppp</sub>, <sup>1</sup>J<sub>Pt-P</sub> = 3020 Hz, M<sub>2</sub>L<sub>2</sub>) ppm. ESI MS (ESI<sup>+</sup>, DMSO/acetonitrile): *m/z* = 1381 ([4:4:5]<sup>3+</sup>), 1120 ([2:3:2]<sup>2+</sup>), 998 ([1:1:1]<sup>+</sup> and [2:2:2]<sup>2+</sup>), 616 ([2:2:1]<sup>3+</sup>), 566 ([2:2:1] – HOTf)<sup>3+</sup>, 546 ([1:2:0]<sup>2+</sup>). ESI MS (ESI<sup>+</sup>, DMF): *m/z* = 3291 ([3:3:5]<sup>+</sup> and [6:6:10]<sup>2+</sup>), 2144 ([2:2:3]<sup>+</sup> and [4:4:6]<sup>2+</sup>), 1692 ([3:4:4]<sup>2+</sup>), 1570 ([3:3:4]<sup>2+</sup>), 1238 ([1:2:1]<sup>+</sup>), 998 ([1:1:1]<sup>+</sup> and [2:2:2]<sup>2+</sup>), 756 ([1:0:1]<sup>+</sup>) 616 ([2:2:1]<sup>3+</sup>).

**[(Pt(dppp))<sub>2</sub>(14)<sub>2</sub>](OTf)<sub>4</sub> 32a** (C<sub>84</sub>H<sub>80</sub>F<sub>12</sub>N<sub>8</sub>O<sub>14</sub>P<sub>4</sub>Pt<sub>2</sub>S<sub>4</sub>; 2295.87 g/mol; M<sub>2</sub>L<sub>2</sub>) and **[(Pt(dppp))<sub>3</sub>(14)<sub>3</sub>](OTf)<sub>6</sub> 32b** (C<sub>126</sub>H<sub>84</sub>F<sub>18</sub>N<sub>12</sub>O<sub>21</sub>P<sub>6</sub>Pt<sub>3</sub>S<sub>6</sub>; 3407.52 g/mol; M<sub>3</sub>L<sub>3</sub>): <sup>1</sup>H NMR (DMF-*d*<sub>7</sub>, 500 MHz, 273K): δ = 9.09 (s, H<sub>o</sub>-pyridine, M<sub>2</sub>L<sub>2</sub>), 8.84 (s, H<sub>o</sub>-pyridine, M<sub>3</sub>L<sub>3</sub>), 8.51 (s, H<sub>o</sub>-pyridine M<sub>2</sub>L<sub>2</sub>), 8.00-7.15 (m, NH<sub>urea</sub> (M<sub>3</sub>L<sub>3</sub>), H<sub>dppp</sub>-phenyl, H<sub>o</sub>-pyridine, and H<sub>o</sub>-pyridine, M<sub>2</sub>L<sub>2</sub> and M<sub>3</sub>L<sub>3</sub>), 6.67 (t, NH<sub>urea</sub>, M<sub>2</sub>L<sub>2</sub>), 4.13 and 3.77 (m, NCH<sub>2</sub>, M<sub>2</sub>L<sub>2</sub> and M<sub>3</sub>L<sub>3</sub>), 3.41 (m, (PCH<sub>2</sub>)<sub>dppp</sub>, M<sub>2</sub>L<sub>2</sub> and M<sub>3</sub>L<sub>3</sub>), 1.77 (m, (PCH<sub>2</sub>CH<sub>2</sub>)<sub>dppp</sub>, M<sub>2</sub>L<sub>2</sub> and M<sub>3</sub>L<sub>3</sub>) ppm. <sup>31</sup>P NMR (DMF-*d*<sub>7</sub>, 202 MHz, 298K): -14.6 (s, P<sub>dppp</sub>, <sup>1</sup>J<sub>Pt-P</sub> = 3025 Hz, M<sub>3</sub>L<sub>3</sub>), -15.1 (s, P<sub>dppp</sub>, <sup>1</sup>J<sub>Pt-P</sub> = 3025 Hz, M<sub>3</sub>L<sub>3</sub>) ppm. ESI MS (ESI<sup>+</sup>, DMSO/acetonitrile): *m/z* = 998 ([1:1:1]<sup>+</sup> and [2:2:2]<sup>2+</sup>), 696 ([2:3:1]<sup>3+</sup>), 616 ([2:2:1]<sup>3+</sup>), 546 ([1:2:0]<sup>2+</sup>). ESI MS (ESI<sup>+</sup>, DMF): *m/z* = 3291 ([3:3:5]<sup>+</sup> and [6:6:10]<sup>2+</sup>), 2144 ([2:2:3]<sup>+</sup> and [4:4:6]<sup>2+</sup>), 1238 ([1:2:1]<sup>+</sup>), 998 ([1:1:1]<sup>+</sup> and [2:2:2]<sup>2+</sup>), 756 ([1:0:1]<sup>+</sup>).

**[(Pt(dppp))<sub>2</sub>(15)<sub>2</sub>](OTf)<sub>4</sub> 33a** (C<sub>84</sub>H<sub>80</sub>F<sub>12</sub>N<sub>8</sub>O<sub>14</sub>P<sub>4</sub>Pt<sub>2</sub>S<sub>4</sub>; 2295.87 g/mol; M<sub>2</sub>L<sub>2</sub>): <sup>1</sup>H NMR (DMF-*d*<sub>7</sub>, 500 MHz, 303 K): δ = 8.81 (d, <sup>3</sup>J<sub>HH</sub> = 4.9 Hz, H<sub>o</sub>-pyridine), 7.80 (m, H<sub>dppp</sub>-phenyl), 7.61 (m, H<sub>dppp</sub>-phenyl), 7.51 (m, H<sub>dppp</sub>-phenyl), 7.09 (d, <sup>3</sup>J<sub>HH</sub> = 4.9 Hz, H<sub>m</sub>-pyridine), 6.95 (t, <sup>3</sup>J<sub>HH</sub> = 5.7 Hz, NH<sub>urea</sub>), 4.19 (d, <sup>3</sup>J<sub>HH</sub> = 5.7 Hz, CH<sub>2</sub>), 3.46 (m, (PCH<sub>2</sub>)<sub>dppp</sub>, M<sub>2</sub>L<sub>2</sub> and M<sub>3</sub>L<sub>3</sub>), 1.72 (m, <sup>3</sup>J<sub>P-H</sub> = 24.20 Hz, PCH<sub>2</sub>CH<sub>2</sub>)<sub>dppp</sub>, M<sub>2</sub>L<sub>2</sub> and M<sub>3</sub>L<sub>3</sub>) ppm. <sup>31</sup>P NMR (DMF-*d*<sub>7</sub>, 202 MHz, 298K): -15.5 (s, P<sub>dppp</sub>, <sup>1</sup>J<sub>Pt-P</sub> = 3036 Hz) ppm. ESI MS (ESI<sup>+</sup>, DMSO/acetonitrile): *m/z* = 998 ([1:1:1]<sup>+</sup> and [2:2:2]<sup>2+</sup>), 696 ([2:3:1]<sup>3+</sup>), 616 ([2:2:1]<sup>3+</sup>), 546 ([1:2:0]<sup>2+</sup>). ESI MS (ESI<sup>+</sup>, DMF): *m/z* = 2144 ([2:2:3]<sup>+</sup> and [4:4:6]<sup>2+</sup>), 1238 ([1:2:1]<sup>+</sup>), 998 ([1:1:1]<sup>+</sup> and [2:2:2]<sup>2+</sup>), 756 ([1:0:1]<sup>+</sup>) 616 ([2:2:1]<sup>3+</sup>).

### 1.3 Crystal structure data

Data were collected on a Bruker-Nonius Kappa Apex II diffractometer using graphite-monochromated  $\text{MoK}_\alpha$  radiation ( $\lambda = 0.71073 \text{ \AA}$ ) at 123 K for **12** and **24a**, and 173 K for **10**, **11**, **13**, **23a**, **25a**, and **28a**. *COLLECT*<sup>3</sup> software was used for the data collection and *DENZOSMN*<sup>4</sup> for the data processing. The intensities were corrected for absorption using the multi-scan absorption correction method (*SADABS2008*<sup>5</sup>). The crystal structures were solved by direct methods by *SIR97*<sup>6</sup> (**12**, **13**, **23a**, **24a**, **25a**, and **28a**) and *SHELXS97*<sup>7</sup> (**10** and **11**), and all non-hydrogen atoms were refined anisotropically by full-matrix least-squares calculations<sup>7</sup> based on  $F^2$  using the programs integrated in the *WinGX*<sup>8</sup> program package. The hydrogen atoms of the water molecules in the crystal of **11** have been found in a difference Fourier map and their coordinates and thermal parameters are refined freely. All other hydrogen atoms in **11** and in other structures were included in calculated positions as riding atoms, with *SHELXL97*<sup>7</sup> defaults. In the absence of significant anomalous scattering, the Flack parameter for compound **12** was inconclusive, and the Friedel equivalents were therefore merged prior to the final refinement. Restraints on anisotropic displacement parameters and on geometrical parameters on the heavily disordered triflate anions in **24a**, **25a** and **28a** were applied, as well as one constraint on anisotropic displacement parameters for atoms of one triflate in **25a**. The sulphur and carbon atoms of this triflate in **25a** were refined with fixed occupancy ratio of 0.60/0.40, while some of them in **28a** are refined with fixed occupancy ratio of 0.50/0.50 and 0.60/0.40, respectively. Restraints on anisotropic displacement parameters were also applied during the refinement of some atoms of *N,N*-dimethylformamide molecules, and some geometrical restraints were used in the refinement of one *N,N*-dimethylformamide and one diethylether molecule in **25a** and on the heavily disordered nitrate anion in **23a** were applied. The nitrogen N4N and oxygen O12 atoms in this nitrate is refined with fixed occupancy ratio of 0.60/0.40. The positions of water hydrogen atoms are determined by best hydrogen bond that can be created and coordinates are kept fixed during refinement for **23a**. In **25a** and **28a** the positions of water hydrogen atoms are determined by best hydrogen bond that can be created and are refined with O-H distance restraint of 0.84 Å for **25a** and 1.00 Å for **28a**. The positions of hydrogen atoms in two water molecules in **28a** could not be calculated nor determined and were thus not included in the model. The structures of compounds **24a**, **25a** and **28a** contain solvent accessible voids with small amount of solvent molecule(s) used for re-crystallization. As they could not be modeled satisfactorily, the data were treated with the *SQUEEZE* routine in *PLATON*.<sup>9</sup> Unusually high

residual electron density was observed for **24a** ( $4.215 \text{ e}\text{\AA}^{-3}$ ,  $1.14 \text{ \AA}$  from S18), but could not be modeled, in **23a** the residual electron density of  $4.419 \text{ e}\text{\AA}^{-3}$  was found  $1.25 \text{ \AA}$  from O12' and is a consequence of a disordered nitrate anion present in this structure. Details of crystal data, data collection and refinement parameters are given in Table S1. *PLATON*<sup>9</sup> and *Mercury*<sup>10</sup> programs were used for structure analysis and the preparation of drawings. CCDC 864202 - 864209 contain the supplementary crystallographic data for this paper. These data can be obtained free of charge from The Cambridge Crystallographic Data Centre via [www.ccdc.cam.ac.uk/data\\_request/cif](http://www.ccdc.cam.ac.uk/data_request/cif).

**Table S1.** X-ray crystallographic data for ligands **10**, **11**, **12**, **13** and complexes **23a**, **24a**, **25a**, and **28a**.

|                                                                | <b>10</b>                                        | <b>11</b>                                                     | <b>12</b>                                        | <b>13</b>                                        | <b>23a</b>                                                                      | <b>24a</b>                                                                                                                   | <b>25a</b>                                                                                                                        | <b>28a</b>                                                                                                                                      |
|----------------------------------------------------------------|--------------------------------------------------|---------------------------------------------------------------|--------------------------------------------------|--------------------------------------------------|---------------------------------------------------------------------------------|------------------------------------------------------------------------------------------------------------------------------|-----------------------------------------------------------------------------------------------------------------------------------|-------------------------------------------------------------------------------------------------------------------------------------------------|
| Formula                                                        | C <sub>13</sub> H <sub>14</sub> N <sub>4</sub> O | C <sub>16</sub> H <sub>20</sub> N <sub>6</sub> O <sub>2</sub> | C <sub>13</sub> H <sub>14</sub> N <sub>4</sub> O | C <sub>13</sub> H <sub>14</sub> N <sub>4</sub> O | C <sub>30</sub> H <sub>52</sub> N <sub>16</sub> O <sub>18</sub> Pd <sub>2</sub> | C <sub>80</sub> H <sub>72</sub> F <sub>12</sub> N <sub>8</sub> O <sub>14</sub> P <sub>4</sub> Pd <sub>2</sub> S <sub>4</sub> | C <sub>95</sub> H <sub>108</sub> F <sub>12</sub> N <sub>11</sub> O <sub>18.50</sub> P <sub>4</sub> Pd <sub>2</sub> S <sub>4</sub> | C <sub>85.50</sub> H <sub>85</sub> Cl <sub>3</sub> F <sub>12</sub> N <sub>8</sub> O <sub>16</sub> P <sub>4</sub> Pd <sub>2</sub> S <sub>4</sub> |
| Formula weight                                                 | 242.28                                           | 328.38                                                        | 242.28                                           | 242.28                                           | 1137.68                                                                         | 2062.38                                                                                                                      | 2392.84                                                                                                                           | 2275.85                                                                                                                                         |
| Crystal system                                                 | monoclinic                                       | monoclinic                                                    | orthorhombic                                     | monoclinic                                       | monoclinic                                                                      | triclinic                                                                                                                    | triclinic                                                                                                                         | monoclinic                                                                                                                                      |
| Space group                                                    | <i>P</i> 2 <sub>1</sub> / <i>c</i>               | <i>P</i> 2 <sub>1</sub> / <i>c</i>                            | <i>P</i> <i>c</i> 2 <sub>1</sub> <i>b</i>        | <i>P</i> 2 <sub>1</sub> / <i>c</i>               | <i>P</i> 2 <sub>1</sub> / <i>c</i>                                              | <i>P</i> $\bar{1}$                                                                                                           | <i>P</i> $\bar{1}$                                                                                                                | <i>P</i> 2 <sub>1</sub> / <i>n</i>                                                                                                              |
| <i>a</i> / Å                                                   | 12.0896(2)                                       | 8.4693(4)                                                     | 8.3851(7)                                        | 7.3327(3)                                        | 13.577(4)                                                                       | 15.7089(3)                                                                                                                   | 16.3896(2)                                                                                                                        | 23.0442(5)                                                                                                                                      |
| <i>b</i> / Å                                                   | 4.5931(1)                                        | 13.3280(6)                                                    | 11.5345(6)                                       | 8.3914(3)                                        | 15.891(5)                                                                       | 16.7004(3)                                                                                                                   | 18.3213(2)                                                                                                                        | 19.7734(4)                                                                                                                                      |
| <i>c</i> / Å                                                   | 21.5276(5)                                       | 15.0145(8)                                                    | 12.4214(10)                                      | 19.4356(9)                                       | 20.526(6)                                                                       | 34.7739(6)                                                                                                                   | 21.5285(3)                                                                                                                        | 25.6540(5)                                                                                                                                      |
| $\alpha$ / °                                                   | 90                                               | 90                                                            | 90                                               | 90                                               | 90                                                                              | 85.194(1)                                                                                                                    | 87.680(1)                                                                                                                         | 90                                                                                                                                              |
| $\beta$ / °                                                    | 96.920(1)                                        | 103.537(4)                                                    | 90                                               | 91.255(2)                                        | 91.995(7)                                                                       | 82.836(1)                                                                                                                    | 78.927(1)                                                                                                                         | 106.841(1)                                                                                                                                      |
| $\gamma$ / °                                                   | 90                                               | 90                                                            | 90                                               | 90                                               | 90                                                                              | 88.750(1)                                                                                                                    | 71.110(1)                                                                                                                         | 90                                                                                                                                              |
| <i>V</i> / Å <sup>3</sup>                                      | 1186.69(4)                                       | 1647.7(1)                                                     | 1201.4(1)                                        | 1195.6(1)                                        | 4426 (2)                                                                        | 9019.1(3)                                                                                                                    | 6000.9(1)                                                                                                                         | 11188.2(4)                                                                                                                                      |
| <i>Z</i>                                                       | 4                                                | 4                                                             | 4                                                | 4                                                | 4                                                                               | 4                                                                                                                            | 2                                                                                                                                 | 4                                                                                                                                               |
| <i>D</i> <sub>calc.</sub> / g cm <sup>-3</sup>                 | 1.356                                            | 1.324                                                         | 1.34                                             | 1.346                                            | 1.695                                                                           | 1.519                                                                                                                        | 1.324                                                                                                                             | 1.351                                                                                                                                           |
| $\mu$ /mm <sup>-1</sup>                                        | 0.091                                            | 0.092                                                         | 0.090                                            | 0.090                                            | 0.903                                                                           | 0.651                                                                                                                        | 0.503                                                                                                                             | 0.602                                                                                                                                           |
| $\theta$ range / °                                             | 3.40 - 25.00                                     | 2.47 - 24.99                                                  | 2.93 - 25.00                                     | 3.21 - 24.98                                     | 1.62 - 30.05                                                                    | 0.59 - 25.00                                                                                                                 | 2.67 - 25.00                                                                                                                      | 1.94 - 25.00                                                                                                                                    |
| Coll. Refl. no.                                                | 3886                                             | 21314                                                         | 7448                                             | 15175                                            | 65917                                                                           | 75806                                                                                                                        | 71355                                                                                                                             | 77842                                                                                                                                           |
| Indpt. refl. No./ <i>R</i> <sub>int.</sub>                     | 2093/0.0244                                      | 2890/0.1406                                                   | 1112/0.0869                                      | 2094/0.0725                                      | 12812/0.0388                                                                    | 31694/0.0543                                                                                                                 | 21076/0.050                                                                                                                       | 19696/0.058                                                                                                                                     |
| Refl. No. <i>I</i> ≥ 2σ( <i>I</i> )                            | 1769                                             | 1808                                                          | 950                                              | 1568                                             | 10995                                                                           | 19752                                                                                                                        | 16013                                                                                                                             | 13377                                                                                                                                           |
| Data/Restr/Param                                               | 2093/0/165                                       | 2890/2/227                                                    | 1112/1/165                                       | 2094/0/165                                       | 12812/555/0                                                                     | 31694/269/2233                                                                                                               | 21076/107/1317                                                                                                                    | 19696/1256/124                                                                                                                                  |
| <i>S</i>                                                       | 1.100                                            | 1.017                                                         | 1.068                                            | 1.056                                            | 1.169                                                                           | 1.175                                                                                                                        | 1.115                                                                                                                             | 1.097                                                                                                                                           |
| <i>R</i> [ <i>I</i> ≥ 2σ( <i>I</i> )]<br><i>R</i> [all data]   | 0.0357/0.0452                                    | 0.0566/0.1087                                                 | 0.0444/0.0568                                    | 0.0516/0.0763                                    | 0.0631/0.0725                                                                   | 0.1103/0.1532                                                                                                                | 0.0780/0.1000                                                                                                                     | 0.1129/0.1470                                                                                                                                   |
| <i>wR</i> [ <i>I</i> ≥ 2σ( <i>I</i> )]<br><i>wR</i> [all data] | 0.0871/0.0930                                    | 0.1085/0.1278                                                 | 0.0880/0.0929                                    | 0.1163/0.1288                                    | 0.1356/0.1385                                                                   | 0.3137/0.3438                                                                                                                | 0.2499/0.2707                                                                                                                     | 0.3102/0.3338                                                                                                                                   |
| Res. el. dens./e Å <sup>-3</sup>                               | 0.152/-0.198                                     | 0.262/-0.205                                                  | 0.176/-0.180                                     | 0.206/-0.218                                     | 1.705/-1.745                                                                    | 4.215/-2.411                                                                                                                 | 2.761/-2.813                                                                                                                      | 3.039/-2.629                                                                                                                                    |

## 2. Additional data on the di-pyridylurea ligands

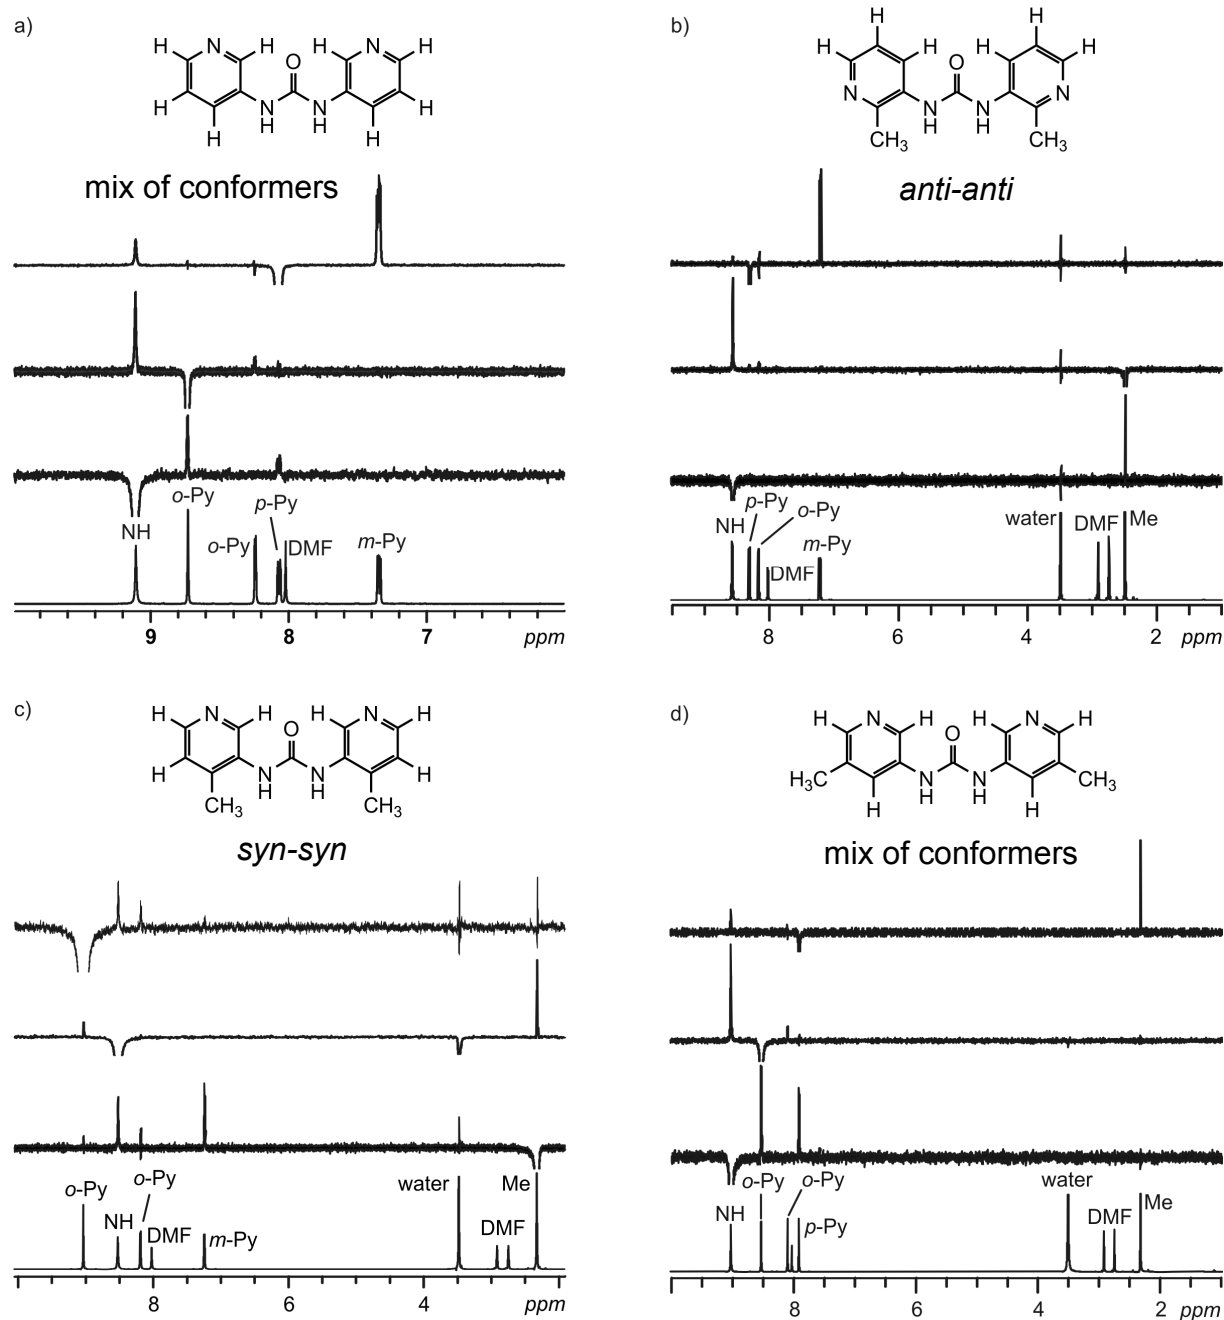

**Figure S1.** The 1D  $^1\text{H}$  NOESY NMR spectra of ligands a) **9**, b) **10**, c) **11**, and d) **12**. All spectra were recorded in  $\text{DMF-}d_7$  at 298 K. Due to its low solubility, no NOESY NMR spectra of ligand **13** could be recorded.

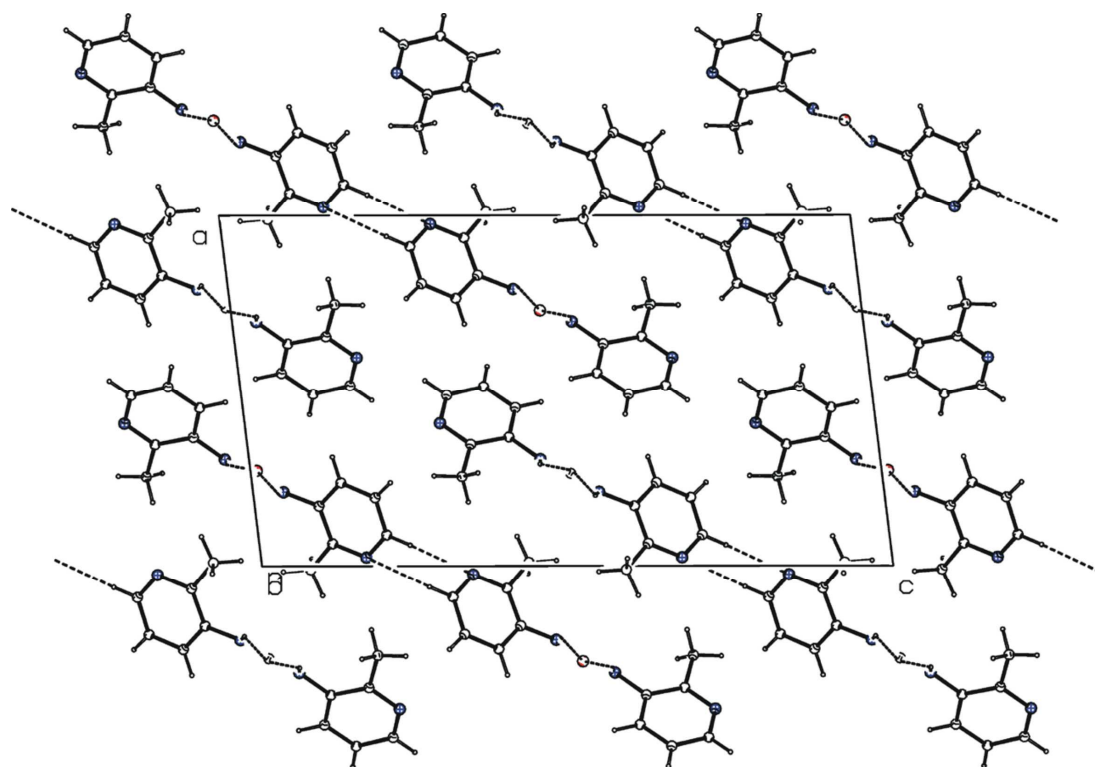

**Figure S2.** A crystal packing diagram of **10**, viewed along the crystallographic *b* axis, showing hydrogen-bonded sheets. Hydrogen bonds are indicated by dashed lines.



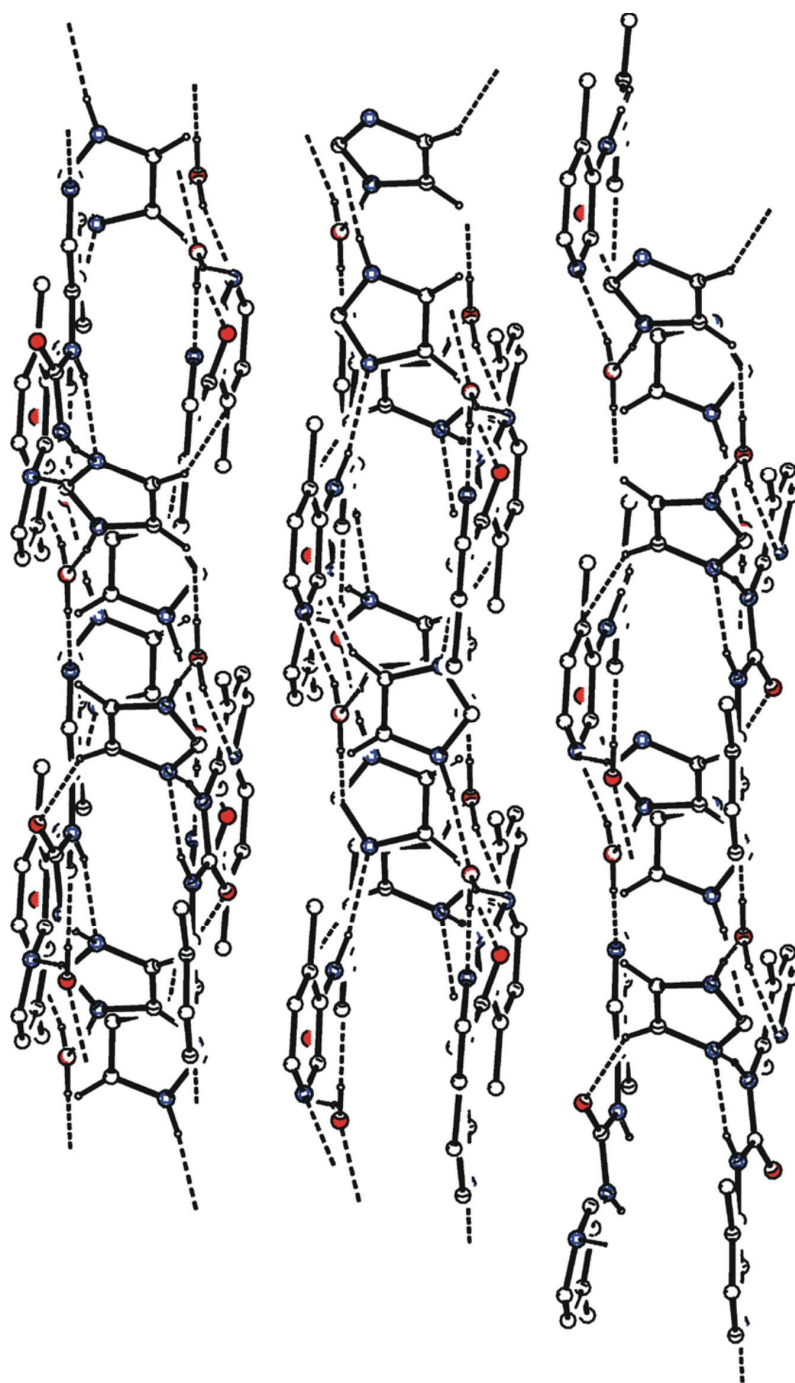

**Figure S3.** A part of the crystal structure of **11**, showing a two-dimensional network and imidazole hydrogen atoms pointing to the pyridine rings of the neighbouring molecules. Hydrogen bonds are indicated by dashed lines, and hydrogen atoms not involved in intermolecular interactions have been omitted for clarity.

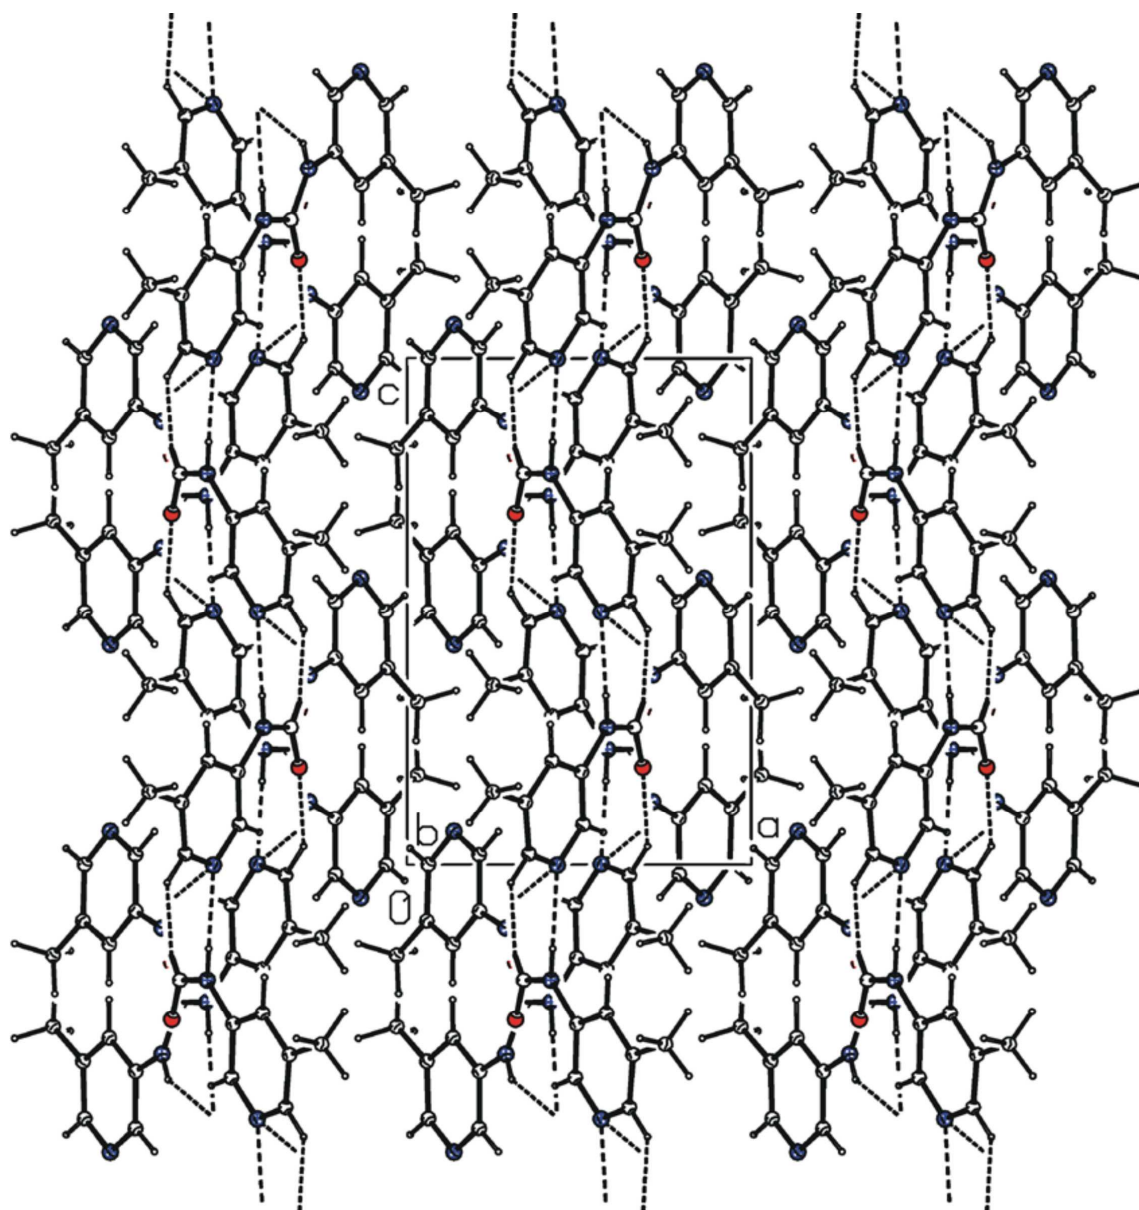

**Figure S4.** A crystal packing diagram of **12**, viewed along the crystallographic *b* axis, showing a two-dimensional network formed by N–H···N and C–H···O hydrogen bonds. Hydrogen bonds are indicated by dashed lines.

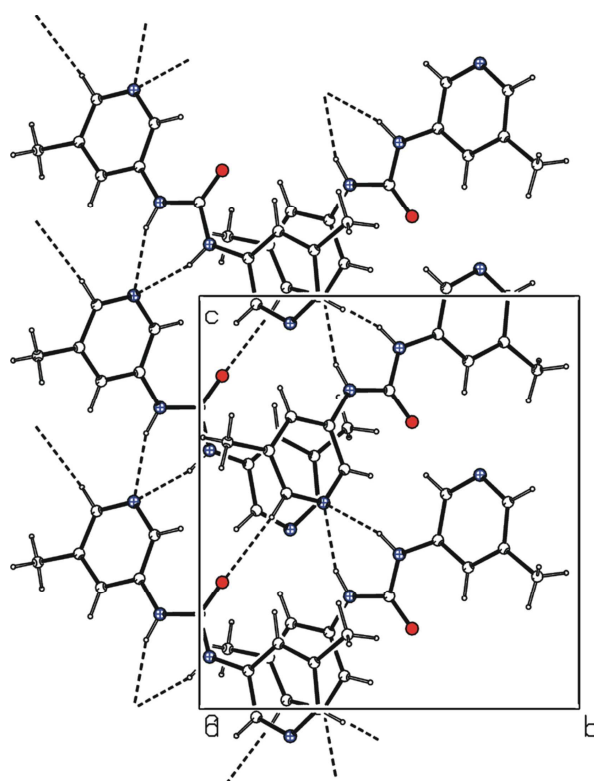

**Figure S5.** A crystal packing diagram of **12**, viewed along the crystallographic *a* axis, showing stacking of the molecules and  $\pi\cdots\pi$  interactions.

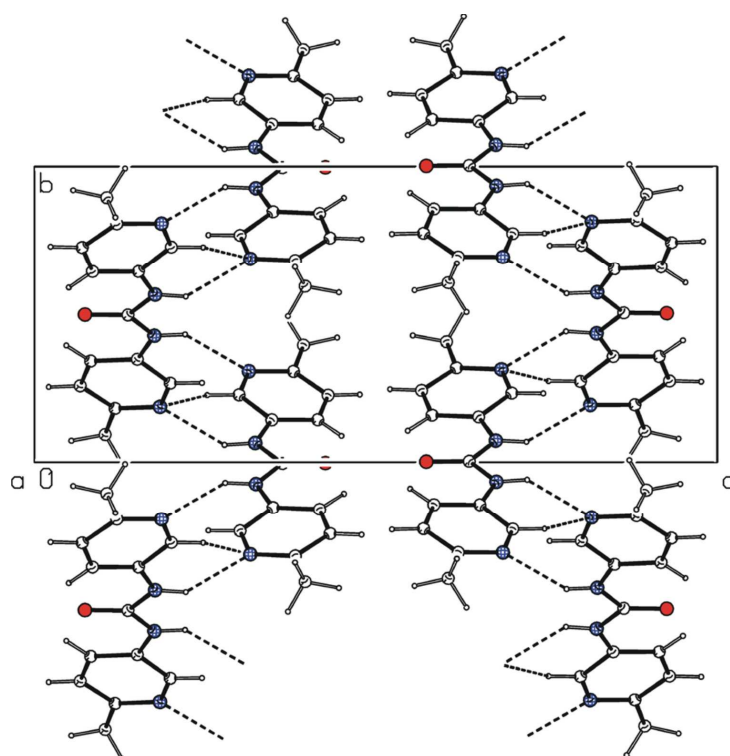

**Figure S6.** A crystal packing diagram of **13**, viewed along the crystallographic *a* axis, showing a two-dimensional network formed by N–H $\cdots$ N and C–H $\cdots$ N hydrogen bonds. Hydrogen bonds are indicated by dashed lines.

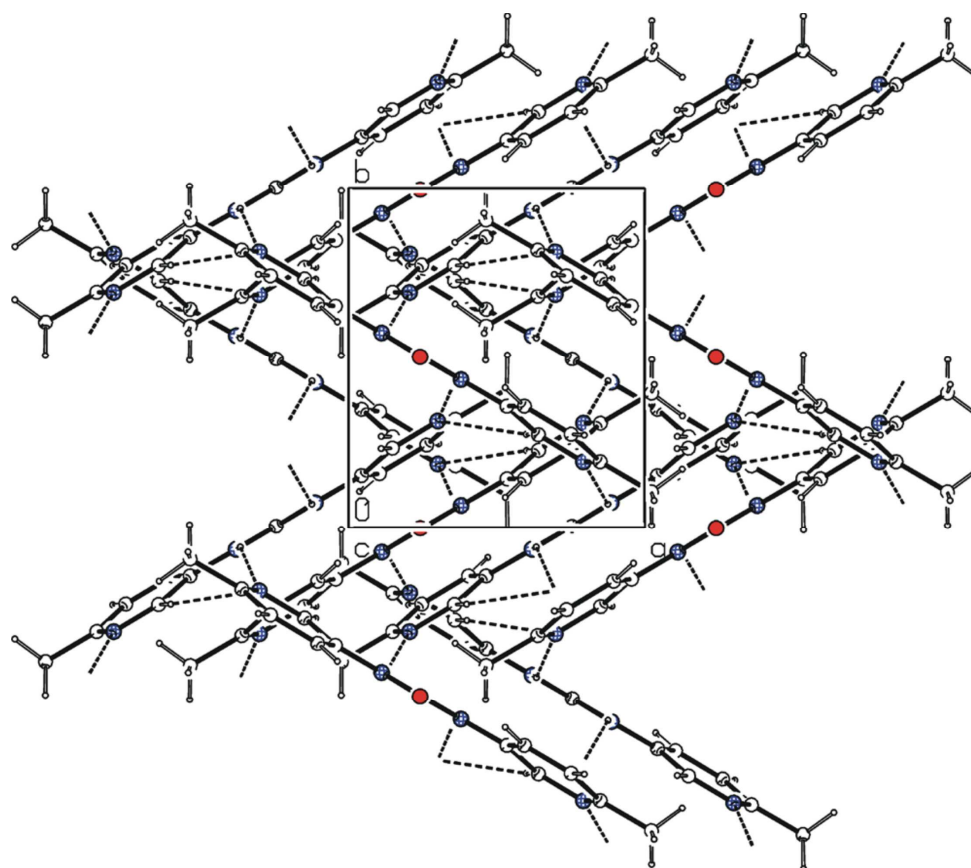

**Figure S7.** A crystal packing diagram of **13**, viewed along the crystallographic *c* axis, showing hydrogen-bonded molecules disposed in herringbone fashion. Hydrogen bonds are indicated by dashed lines.

**Table S2.** Dihedral angle analysis of ligands **10** - **13**.

|                                  | <b>10</b> | <b>11</b>  | <b>12</b> | <b>13</b>  |
|----------------------------------|-----------|------------|-----------|------------|
| <b>Py (N1-C6)/ Py' (N1'-C6')</b> | 26.95(7)° | 12.86(15)° | 14.3(2)°  | 18.91(12)° |
| <b>N7/C8/O8/N7' / Py</b>         | 44.86(8)° | 21.91(17)° | 4.3(2)°   | 8.26(14)°  |
| <b>N7/C8/O8/N7' / Py'</b>        | 49.20(8)° | 16.20(17)° | 14.8(2)°  | 11.19(14)° |

**Table S3.** Hydrogen-bonding geometry for ligands **10** - **13**.

|           | D-H...A        | D-H<br>(Å) | H...A<br>(Å) | D...A<br>(Å) | D-H...A<br>(°) | Symmetry codes     |
|-----------|----------------|------------|--------------|--------------|----------------|--------------------|
| <b>10</b> | C4-H4...O8     | 0.95       | 2.58         | 2.9409(18)   | 103            |                    |
|           | C4'-H4'...O8   | 0.95       | 2.64         | 2.9452(18)   | 99             |                    |
|           | N7-H7...O8     | 0.88       | 2.08         | 2.8638(16)   | 148            | x, -1+y, z         |
|           | N7'-H7'...O8   | 0.88       | 2.11         | 2.8793(17)   | 145            | x, -1+y, z         |
|           | C6'-H6'...N1'  | 0.95       | 2.61         | 3.556(2)     | 178            | 2-x, 1/2+y, 1/2-z  |
| <b>11</b> | C2-H2...O8     | 0.95       | 2.27         | 2.845(4)     | 118            |                    |
|           | C2'-H2'...O8   | 0.95       | 2.22         | 2.834(4)     | 122            |                    |
|           | N7-H7...N10    | 0.88       | 2.18         | 3.011(4)     | 157            |                    |
|           | N7'-H7'...N10  | 0.88       | 2.18         | 3.010(4)     | 158            |                    |
|           | N12-H12...O15  | 0.88       | 1.96         | 2.802(4)     | 159            |                    |
|           | O15-H15A...N1' | 0.96(2)    | 1.84(2)      | 2.784(3)     | 169(4)         | x, -1+y, z         |
|           | O15-H15B...N1  | 0.95(3)    | 1.99(3)      | 2.898(4)     | 158(3)         | 1+x, -1/2-y, 1/2+z |
|           | C14-H14...O8   | 0.95       | 2.53         | 3.376(4)     | 149            | -x, -y, 1-z        |
| <b>12</b> | C2-H2...O8     | 0.95       | 2.26         | 2.890(5)     | 123            |                    |
|           | C4'-H4'...O8   | 0.95       | 2.39         | 2.948(5)     | 117            |                    |
|           | N7-H7...N1     | 0.88       | 2.09         | 2.936(5)     | 162            | 1-x, y, 1/2+z      |
|           | N7'-H7'...N1   | 0.88       | 2.23         | 3.044(5)     | 154            | 1-x, y, 1/2+z      |
|           | C6-H6...O8     | 0.95       | 2.47         | 3.318(5)     | 149            | 1-x, -1/2+y, 1-z   |
| <b>13</b> | C4-H4...O8     | 0.95       | 2.30         | 2.864(3)     | 117            |                    |
|           | C4'-H4'...O8   | 0.95       | 2.28         | 2.872(3)     | 120            |                    |
|           | N7-H7...N1'    | 0.88       | 2.19         | 2.965(3)     | 147            | 1-x, -1/2+y, 1/2-z |
|           | N7'-H7'...N1   | 0.88       | 2.17         | 2.944(3)     | 146            | -x, 1/2+y, 1/2-z   |
|           | C2'-H2'...N1   | 0.95       | 2.57         | 3.342(4)     | 139            | -x, 1/2+y, 1/2-z   |

**Table S4.** The geometry of C–H... $\pi$  interactions for **10** - **13**.

|           | D–H...Cg                 | D–H<br>(Å) | H...Cg<br>(Å) | D...Cg<br>(Å) | D–H...Cg<br>(°) | Symmetry codes     |
|-----------|--------------------------|------------|---------------|---------------|-----------------|--------------------|
| <b>10</b> | C9–H9C...Py <sup>a</sup> | 0.98       | 2.73          | 3.4593(16)    | 132             | x, -1+y, z         |
|           | C9'–H91'...Py'           | 0.98       | 2.71          | 3.5799(18)    | 148             | x, -1+y, z         |
| <b>11</b> | C13–H13...Py             | 0.95       | 2.80          | 3.554(4)      | 137             | x, -1/2-y, 1/2+z   |
| <b>12</b> | C9'–H92'...Py            | 0.98       | 2.80          | 3.683(5)      | 150             | -1+x, 1/2+y, 3/2-z |
| <b>13</b> | C9–H9C...Py'             | 0.98       | 2.82          | 3.582(3)      | 135             | -1+x, -1+y, z      |
|           | C9'–H93'...Py            | 0.98       | 2.82          | 3.552(3)      | 132             | 1+x, 1+y, z        |

<sup>a</sup> Py denotes the N1/C2/C3/C4/C5/C6 ring, and Py' the N1'/C2'/C3'/C4'/C5'/C6' pyridine ring

**Table S5.** The geometry of  $\pi$ ... $\pi$  interactions for ligand **13**.

|           | Cg...Cg              | Cg...Cg<br>(Å) | $\alpha$<br>(°) | CgI...Perp<br>(Å) | Slippage<br>(Å) | Symmetry codes   |
|-----------|----------------------|----------------|-----------------|-------------------|-----------------|------------------|
| <b>13</b> | Py...Py <sup>a</sup> | 3.795(2)       | 5.3(2)          | 3.5084(17)        | <i>ca.</i> 1.45 | x, -1/2+y, 3/2-z |
|           | Py'...Py             | 3.795(2)       | 5.3(2)          | 3.5061(17)        | <i>ca.</i> 1.45 | x, 1/2+y, 3/2-z  |

<sup>a</sup> Py denotes the N1/C2/C3/C4/C5/C6 ring, and Py' the N1'/C2'/C3'/C4'/C5'/C6' pyridine ring

### 3. Additional data on the metallo-supramolecular complexes

**Table S6.** Selected bond lengths and angles of the crystal structures of complexes **23a**, **24a**, **25a** and **28**.

| length / angle    | <b>23a</b> | <b>24a</b> | <b>25a</b> | <b>28</b> |
|-------------------|------------|------------|------------|-----------|
| Pd1-N11 (Å)       | 2.036(4)   | 2.106(7)   | 2.100(4)   | 2.087(6)  |
| Pd1-N12 (Å)       | 2.032(4)   | 2.100(7)   | 2.107(4)   | 2.099(6)  |
| Pd2-N11' (Å)      | 2.047(4)   | 2.078(9)   | 2.095(5)   | 2.087(7)  |
| Pd2-N12' (Å)      | 2.038(4)   | 2.113(9)   | 2.106(4)   | 2.103(6)  |
| Pd3-N13 (Å)       |            | 2.106(3)   |            |           |
| Pd3-N14 (Å)       |            | 2.102(7)   |            |           |
| Pd4-N13' (Å)      |            | 2.088(10)  |            |           |
| Pd4-N14' (Å)      |            | 2.119(9)   |            |           |
| N11-Pd1-N12 (°)   | 90.99(15)  | 85.7(3)    | 86.22(16)  | 86.0(2)   |
| N11'-Pd1-N12' (°) | 91.56(16)  | 86.3(4)    | 88.59(17)  | 85.8(3)   |
| N13-Pd1-N14 (°)   |            | 85.7(3)    |            |           |
| N13'-Pd1-N14' (°) |            | 86.2(4)    |            |           |
| Pd1-N1 (Å)        | 2.036(4)   |            |            |           |
| Pd1-N2 (Å)        | 2.034(4)   |            |            |           |
| Pd2-N3 (Å)        | 2.028(4)   |            |            |           |
| Pd2-N4 (Å)        | 2.025(4)   |            |            |           |
| N1-Pd1-N2 (°)     | 84.63(17)  |            |            |           |
| N3-Pd2-N4 (°)     | 84.22(17)  |            |            |           |
| Pd1-P1 (Å)        |            | 2.275(2)   | 2.2745(14) | 2.275(2)  |
| Pd1-P2 (Å)        |            | 2.281(2)   | 2.2787(14) | 2.275(2)  |
| Pd2-P3 (Å)        |            | 2.274(3)   | 2.2818(14) | 2.273(2)  |
| Pd2-P4 (Å)        |            | 2.262(3)   | 2.2714(15) | 2.281(2)  |
| Pd3-P5 (Å)        |            | 2.263(3)   |            |           |
| Pd3-P6 (Å)        |            | 2.277(3)   |            |           |
| Pd4-P7 (Å)        |            | 2.269(4)   |            |           |
| Pd4-P8 (Å)        |            | 2.273(3)   |            |           |
| P1-Pd1-P2 (°)     |            | 90.54(9)   | 89.36(5)   | 90.36(8)  |
| P3-Pd2-P4 (°)     |            | 89.97(12)  | 92.28(5)   | 90.55(8)  |
| P5-Pd3-P6 (°)     |            | 90.49(9)   |            |           |
| P7-Pd4-P8 (°)     |            | 89.62(13)  |            |           |



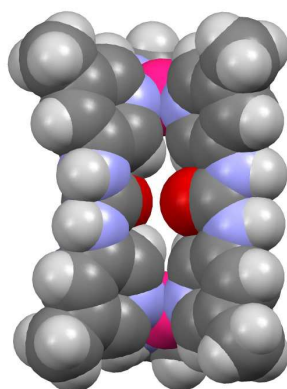

**Figure S8.** Spacefilling model of the cation of complex **23a**, showing the space between the two bispyridylurea ligands which are too small for counter-anion encapsulation. Counter-anions and solvent molecules have been omitted for clarity.

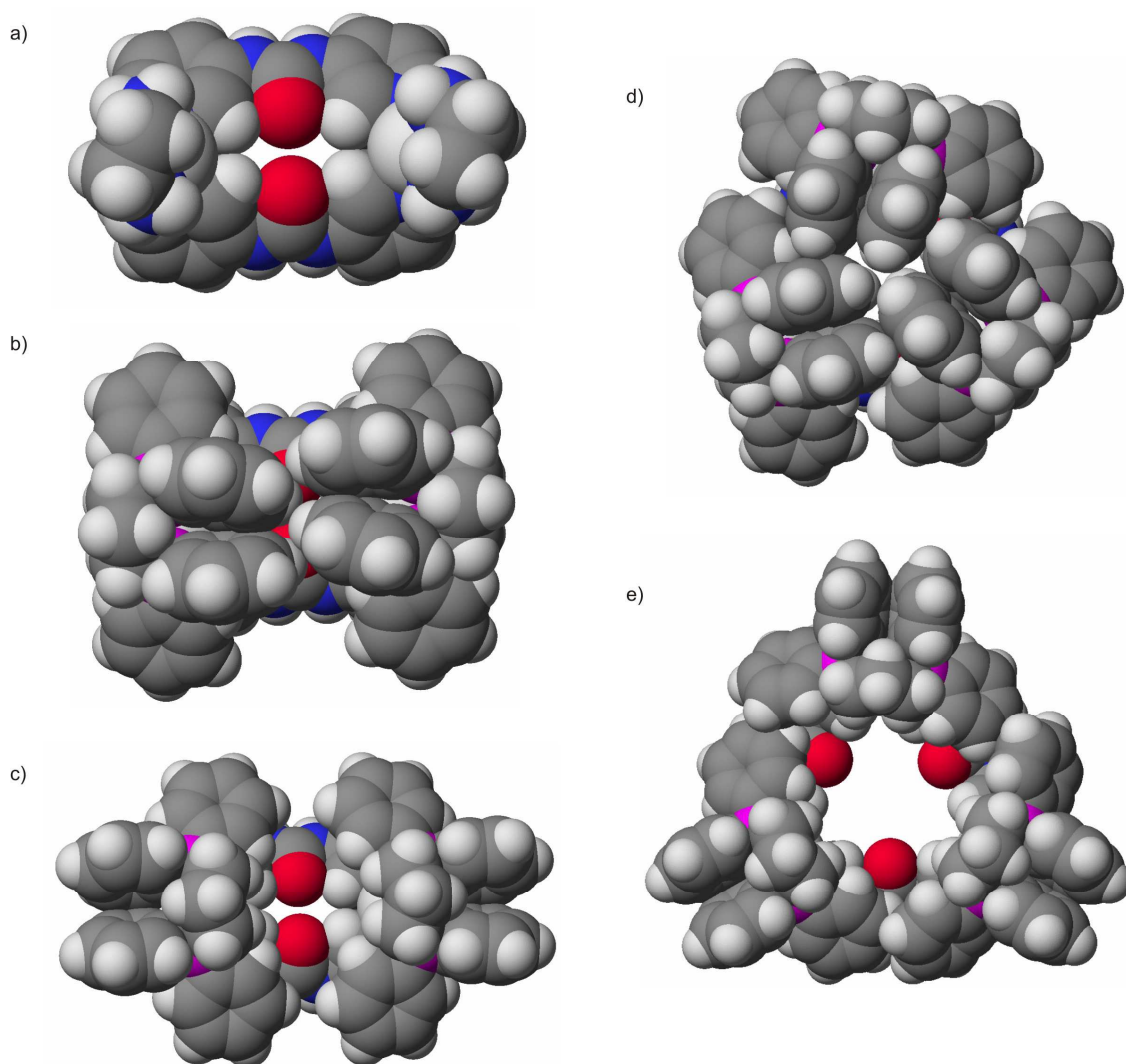

**Figure S9.** MM2 force-field-optimized structures of a) **19a**, b) the small isomer of **22a**, c) the large isomer of **22a**, d) the small isomer of **22b** and e) the large isomer of **22b** in space-filling representation.

**Table S7.** The experimental data of the  $^1\text{H}$  NMR DOSY experiments compared to the calculated radii of the complexes under study. The radii were obtained from calculated structures which were geometry-optimized using the MM2 force field.

| Compound   | solvent | T<br>[K] | D<br>[m <sup>2</sup> s <sup>-1</sup> ] | r <sub>exp.</sub><br>[nm] | r <sub>cal.</sub><br>[nm] |
|------------|---------|----------|----------------------------------------|---------------------------|---------------------------|
| <b>19a</b> | DMSO    | 298      | $1.41 \cdot 10^{-10}$                  | 0.778                     | 0.879                     |
| <b>20a</b> | DMSO    | 298      | $1.30 \cdot 10^{-10}$                  | 0.840                     | 0.905                     |
| <b>21a</b> | DMSO    | 298      | $1.32 \cdot 10^{-10}$                  | 0.829                     | 0.992                     |
| <b>22a</b> | DMSO    | 298      | $1.21 \cdot 10^{-10}$                  | 0.907                     | 0.967                     |
| <b>23a</b> | DMSO    | 298      | $1.32 \cdot 10^{-10}$                  | 0.831                     | 1.045                     |
| <b>24a</b> | DMF     | 243      | $1.19 \cdot 10^{-10}$                  | 0.759                     | 1.048                     |
| <b>24b</b> | DMF     | 243      | $8.43 \cdot 10^{-11}$                  | 1.188                     | 1.098                     |
| <b>25a</b> | DMF     | 273      | $2.10 \cdot 10^{-10}$                  | 0.826                     | 1.066                     |
| <b>25b</b> | DMF     | 273      | $1.84 \cdot 10^{-10}$                  | 0.942                     | 1.093                     |
| <b>26a</b> | DMF     | 243      | $8.88 \cdot 10^{-11}$                  | 1.013                     | 1.065                     |
| <b>26b</b> | DMF     | 243      | $8.43 \cdot 10^{-11}$                  | 1.066                     | 1.100                     |
| <b>27a</b> | DMF     | 233      | $7.03 \cdot 10^{-11}$                  | 1.002                     | 1.190                     |
| <b>27b</b> | DMF     | 233      | $6.69 \cdot 10^{-11}$                  | 1.053                     | 1.307                     |
| <b>28a</b> | DMF     | 243      | $7.83 \cdot 10^{-11}$                  | 1.149                     | 1.271                     |
| <b>29a</b> | DMF     | 298      | $2.93 \cdot 10^{-10}$                  | 0.918                     | 1.052                     |
| <b>29b</b> | DMF     | 298      | $2.64 \cdot 10^{-10}$                  | 1.019                     | 1.102                     |
| <b>30a</b> | DMF     | 298      | $2.71 \cdot 10^{-10}$                  | 0.992                     | 1.075                     |
| <b>30b</b> | DMF     | 298      | $2.54 \cdot 10^{-10}$                  | 1.060                     | 1.097                     |
| <b>31a</b> | DMF     | 298      | $2.81 \cdot 10^{-10}$                  | 0.958                     | 1.068                     |
| <b>31b</b> | DMF     | 298      | $2.59 \cdot 10^{-10}$                  | 1.038                     | 1.104                     |
| <b>32a</b> | DMF     | 298      | $2.92 \cdot 10^{-10}$                  | 0.921                     | 1.193                     |
| <b>32b</b> | DMF     | 298      | $2.47 \cdot 10^{-10}$                  | 1.089                     | 1.317                     |
| <b>33a</b> | DMF     | 298      | $2.65 \cdot 10^{-10}$                  | 1.014                     | 1.276                     |

Viscosity coefficients used for DMF at different temperatures:  $\eta_{233\text{ K}} = 2.420\text{ g m}^{-1}\text{s}^{-1}$ ,  $\eta_{243\text{ K}} = 1.979\text{ g m}^{-1}\text{s}^{-1}$ ,  $\eta_{273\text{ K}} = 1.154\text{ g m}^{-1}\text{s}^{-1}$ ,  $\eta_{298\text{ K}} = 0.811\text{ g m}^{-1}\text{s}^{-1}$ . The viscosities for 233 K and 243 K were extrapolated from literature data.<sup>11</sup> The viscosity coefficient for DMSO at 298 K is:  $\eta_{298\text{ K}} = 1.996\text{ g m}^{-1}\text{s}^{-1}$

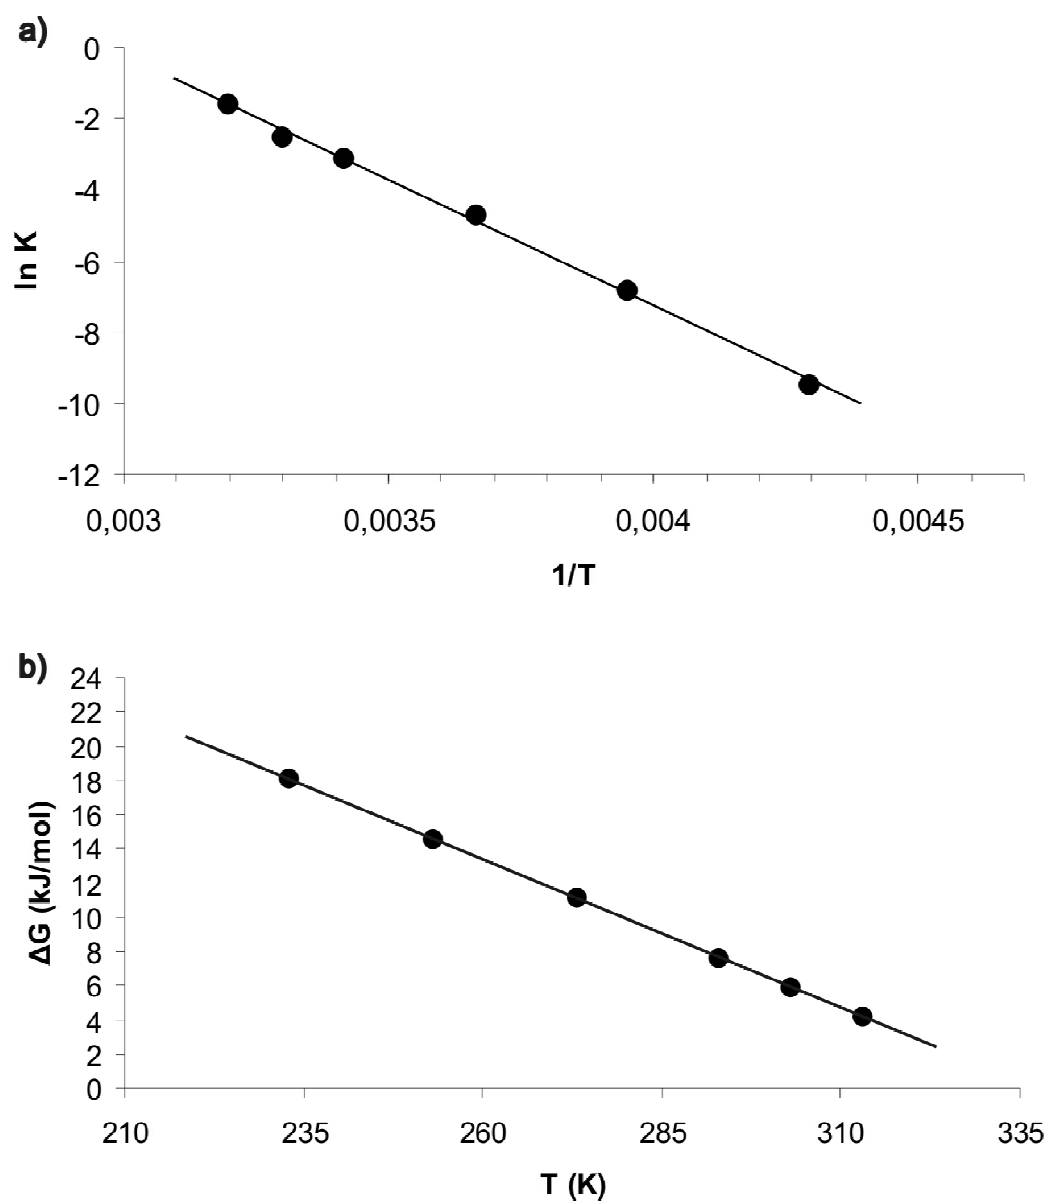

**Figure S10.** a) Van't Hoff plot of  $\ln K$  over  $1/T$  for the equilibrium of **24a/b** and b) plot of free enthalpy  $\Delta G_{eq}$  over temperature  $T$ .

#### 4. Titration of **24a/b** with $\text{NBu}_4\text{H}_2\text{PO}_4$ in $\text{DMF-}d_7$

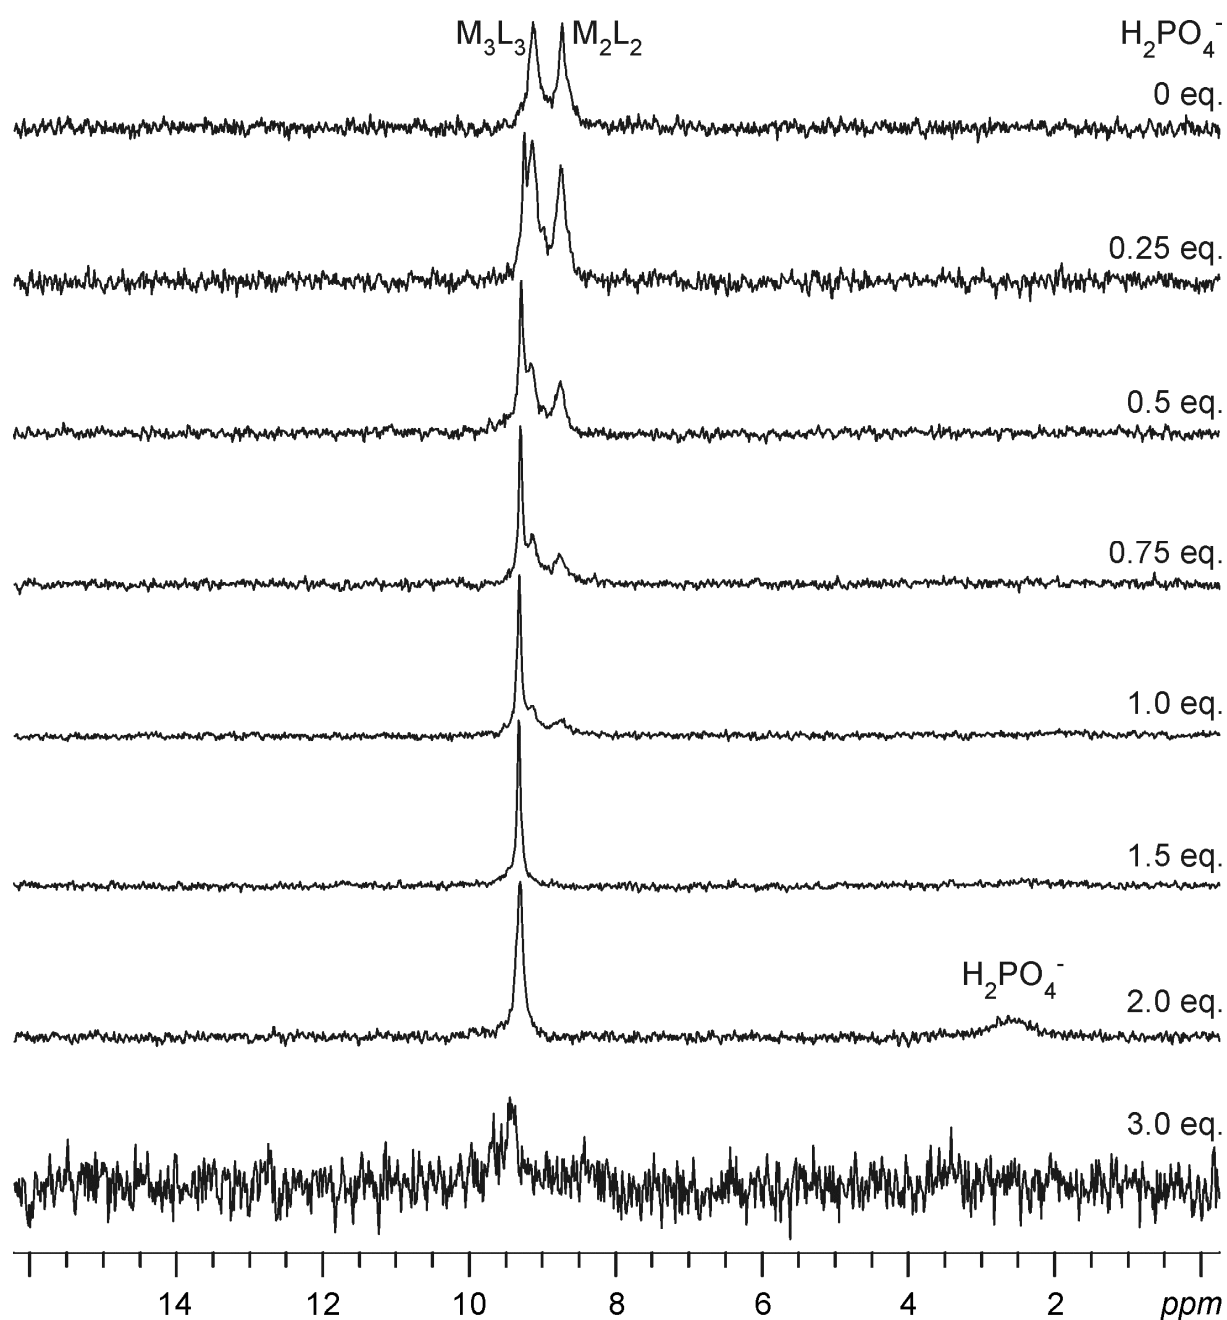

**Figure S11.**  $^{31}\text{P}$  NMR titration of **24a/b** with  $\text{NBu}_4\text{H}_2\text{PO}_4$  in  $\text{DMF-}d_7$ . Clearly, the behaviour is similar to the titration with  $\text{NBu}_4\text{HSO}_4$  as shown in the main text: The initially formed  $\text{M}_3\text{L}_3$  and  $\text{M}_2\text{L}_2$  complexes converge into one new species upon addition of 1 eq. of the guest salt.

## 5. References

- 1 (a) T. G. Apleton, M. A. Bennett and I. B. Tomkins, *J. Chem. Soc., Dalton Trans.*, 1976, 439-446; (b) P. J. Stang, D. H. Cao, S. Saito and A. M. Arif, *J. Am. Chem. Soc.*, 1995, **117**, 6273-6283.
- 2 T. Weilandt, R. W. Troff, H. Saxell, K. Rissanen and C. A. Schalley, *Inorg. Chem.*, 2008, **47**, 7588-7598.
- 3 R. W. W. Hooft, *COLLECT*; Nonius BV: Delft, The Netherlands, 1998.
- 4 Z. Otwinowski and W. Minor, in *Methods in Enzymology*, ed. C. W. Carter Jr., R. M. Sweet, Academic Press, New York, 1997, Vol. 276: Macromolecular Crystallography, Part A.
- 5 G. M. Sheldrick, *SADABS 2008/2*; University of Göttingen: Göttingen, Germany, 2008.
- 6 A. Altomare, M. C. Burla, M. Camalli, G. L. Cascarano, C. Giacovazzo, A. Guagliardi, A. G. G. Moliterni, G. Polidori and R. Spagna, *J. Appl. Crystallogr.*, 1999, **32**, 115-119.
- 7 G. M. Sheldrick, *Acta Crystallogr.*, 2008, **A64**, 112-122.
- 8 L. J. Farrugia, *J. Appl. Crystallogr.*, 1999, **32**, 837-838.
- 9 A. L. Spek, *J. Appl. Crystallogr.*, 2003, **36**, 7-13.
- 10 C. F. Macrae, P. R. Edgington, P. McCabe, E. Pidcock, G. P. Shields, R. Taylor, M. Towler and J. van de Streek, *J. Appl. Crystallogr.*, 2006, **39**, 453-457.
- 11 (a) P. K. Tikoo and R. D. Singh, *Electrochim. Acta*, 1981, **26**, 1057-1063; (b) S. Taniewska-Osinska, A. Piekarska and A. Kacperska, *J. Solution Chem.*, 1983, **12**, 717-727; (c) G. Chen, Y. Hou, H. Knapp, *J. Chem. Eng. Data*, 1995, **40**, 1005-1010; (d) A. Ali, A. K. Nain and M. Kamil, *Thermochimica Acta*, 1996, **274**, 209-221; (e) Y. Zhao, J. Wang, X. Xuan and J. Lu, *J. Chem. Eng. Data*, 2000, **45**, 440-444; (f) M. Cocchi, M. Manfredini, D. Manzini, A. Marchetti, S. Sighinolfi, L. Tassi, A. Ulrici, M. Vignali and P. Zannini, *J. Mol. Liq.*, 2003, **102**, 309-345; (g) N. G. Tsierkezos and A. C. Filippou, *J. Chem. Thermodynamics*, 2006, **38**, 952-961.
